# Supplementary material
Source: PubMed Central journal article supplement (PMC11495887)
Supplement: NIHMS2026640-supplement-Supplementary_Information.pdf [file NIHMS2026640-supplement-Supplementary_Information.pdf]

---

**Supplementary information**

---

**Structural basis of mitochondrial protein import by the TIM23 complex**

---

In the format provided by the authors and unedited

## SUPPLEMENTARY DISCUSSION

Our study proposes a model that is notably different from some frequently proposed models regarding the stoichiometry of the complex and the function of the Tim23 subunit. Below we discuss possible sources of these different results and interpretations. We also discuss limitations of our study.

### Copy numbers of Tim23/17

The stoichiometry of the Tim23/17 subunits has long been debated. While several past biochemical studies have suggested that the TIM23 complex contains multiple copies of Tim23 and/or Tim17 (Alder et al., 2008; Bauer et al., 1996; Demishtein-Zohary et al., 2015; Gomkale et al., 2021; Meinecke et al., 2006), some other studies have observed the apparent 1:1 stoichiometry of Tim23 and Tim17 (Moro et al., 1999; Ryan et al., 1998). In addition, the dynamics of subunit assembly have remained unclear. Tim23 dimers, detected by chemical crosslinking, were first proposed to monomerize upon substrate engagement (Bauer et al., 1996). However, more recently, Tim23-Tim23 crosslinking was shown to increase in the presence of a laterally sorted translocation substrate or when non-essential Tim21 is overexpressed but was not detectable in the non-translocating state (Popov-Čeleketić et al., 2008). Also, effects of Tim50 on putative Tim23 dimerization have been debated (Meinecke et al., 2006; Tamura et al., 2009).

Our cryo-EM analysis of the endogenous core complex indicates that the stable structure of Tim23 and Tim17 is a 1:1 heterodimer in a back-to-back arrangement, at least in the idle state (Extended Data Fig. 3). Given the new data showing that Mgr2 is positioned at the lateral opening of Tim17 (present study; Ieva et al., 2014), we consider it unlikely that an additional copy of Tim23 or Tim17 binds to the lateral opening of Tim17. Furthermore, without drastic conformational changes, the current structures of Tim17 and Tim23 seem incompatible with the formation of a channel through face-to-face docking of two copies of Tim17/23. We have also exercised structural predictions of 2:1, 1:2, and 2:2 ratios of Tim23 and Tim17 using AlphaFold2. Regardless of the ratio, they all invariably produced a 1:1 heterodimer in the back-to-back arrangement as in our cryo-EM structure without any pore formation, whereas the extra copy of Tim23 or Tim17 resulted in inconsistent positions.

While previous co-immunoprecipitation results support the idea that additional copies of Tim17 and/or Tim23 exist in the TIM23 complex, their stoichiometry remains unclear. In the study by Gomkale et al. (Gomkale et al., 2021), immunoprecipitation of ALFA-tagged Tim23 and Tim17 copurified untagged Tim23 and Tim17 respectively, but the amounts seemed noticeably substoichiometric to the ALFA-tagged protein when their relative amounts in 'total' and 'elution' samples are compared. This was also the case for the experiment performed for Tim23 in Tamura et al. (Tamura et al., 2009). The exact nature of these small amounts of additional Tim23/17 copies that can be copurified remains unclear. The TIM23 complex might transiently form a larger complex, since mitochondrial protein import typically involves coupled translocation processes by the TOM and TIM23 complexes. For example, it is conceivable that

a single dimeric TOM complex may engage with two copies of the TIM23 complex simultaneously during substrate translocation. It is also possible that some populations of Tim23 and Tim17 proteins assemble into homodimers or form other transient interactions. Previous chemical crosslinking observations might represent these forms (Bauer et al., 1996; Demishtein-Zohary et al., 2015; Popov-Čeleketić et al., 2008; Tamura et al., 2009). Clarification of these issues will require additional functional and structural studies.

### **Channel formation by Tim23**

It has long been thought that the Tim23 subunit forms an aqueous channel. Main supporting data for this model were electrophysiological observations of cation-selective currents by Tim23, which could be further modified by addition of presequence peptides. However, a majority of such experiments were conducted in planar bilayers using refolded Tim23 proteins that were first expressed in *E. coli* as inclusion bodies (Meinecke et al., 2006; Truscott et al., 2001; Zhou et al., 2021). Also, these experiments did not use any other essential membrane components, such as Tim17. It is unclear what structures such denatured Tim23 proteins fold into under these conditions. Recently, an NMR study has used a similar refolding approach in an attempt to determine the structure of the Tim23 protein (Zhou et al., 2021; PDB ID 7CLV). Interestingly, the study found that Tim23 forms a homodimer with a channel-like structure containing a larger cavity within the membrane between the two molecules of Tim23. However, all transmembrane helices of Tim23 in this structure exhibit abnormally loose arrangements without being packed against each other like typical membrane proteins. The structure also has no resemblance to our cryo-EM structure of Tim23, cryo-EM structures of homologous human and yeast Tim22 (Qi et al., 2021; Zhang et al., 2021), or AlphaFold2 predictions of Tim23 (for yeast Tim23, <https://alphafold.ebi.ac.uk/entry/P32897>), all of which showed the same overall fold. Thus, in our view, this NMR structure does not represent a physiologically relevant form of Tim23.

It is also difficult to rule out the possibility that effects of presequence peptides observed in electrophysiological experiments are due to their interactions with the membrane or with the denatured proteins, as presequences are known to form an amphipathic helix. Some other electrophysiological experiments were performed by isolating inner mitochondrial membranes and reconstituting them into proteoliposomes using a drying and rehydrating method (Lohret et al., 1997; Martinez-Caballero et al., 2007). It is unclear whether TIM23 maintains its intact structure during this harsh treatment and whether observed currents were generated truly by TIM23. Because the proteoliposomes contain hundreds of other mitochondrial proteins and manipulation of TIM23 subunit levels can affect the mitochondrial proteome, it may be possible that observed currents were derived from other proteins. It is important to note that there have been no electrophysiological studies on TIM23 performed with a gold standard method like patch clamping of a native membrane with careful controls using pharmacological channel blockers. Without comparison with such data, it is difficult to interpret the physiological relevance of observed channel activities.

Unlike our model, a recent biochemical study has suggested that Mgr2 associates directly with the Tim23 subunit, based on an in-vitro pulldown assay (Matta et al., 2020). However, this

assay also used a Tim23 protein refolded from inclusion bodies and GST-tagged Mgr2 separately purified from *E. coli*, which were mixed in a solution containing Triton X-100. Thus the folding states of these proteins may not represent their native structures.

### **Limitations of our study**

Although the laterally open cavity of Tim17 that can be enclosed by Mgr2 association provides a structurally plausible model for polypeptide translocation, several mechanistic aspects remain yet to be understood. Currently, it is not understood how presequences would initially engage with the Tim17 cavity and whether Mgr2 plays a role in this step. It is also unclear how exactly hydrophilic polypeptides move across the Tim17 cavity without Mgr2 and what the functions of Mgr2 are during protein translocation. Mgr2 may help minimize proton leakage, or prevent misfolding or mis-sorting of client polypeptides in transit, but further structural and functional studies will be necessary to investigate such hypotheses. Our proposed model does not require major conformational changes in Tim17 or Tim23 to explain the protein translocation function of the complex. Nevertheless, we cannot rule out the possibility that the current structure of the core TIM23 complex represents an idle state and that the membrane domain of the translocase may undergo certain conformational changes during the protein translocation cycle. Lastly, many questions remain open regarding the structure and function of other subunits, such as Tim50, Tim21, and the PAM (presequence translocase-associated motor) complex, and whether any further structural rearrangements in the complex occur with the association of these proteins.

### **References cited in Supplementary Discussion**

Alder, N.N., Sutherland, J., Buhring, A.I., Jensen, R.E., and Johnson, A.E. (2008). Quaternary structure of the mitochondrial TIM23 complex reveals dynamic association between Tim23p and other subunits. *Mol. Biol. Cell* 19, 159–170.

Bauer, M.F., Sirrenberg, C., Neupert, W., and Brunner, M. (1996). Role of Tim23 as voltage sensor and presequence receptor in protein import into mitochondria. *Cell* 87, 33–41.

Demishtein-Zohary, K., Marom, M., Neupert, W., Mokranjac, D., and Abdussalam, A. (2015). GxxxG motifs hold the TIM23 complex together. *FEBS J* 282, 2178–2186.

Gomkale, R., Linden, A., Neumann, P., Schendzielorz, A.B., Stoldt, S., Dybkov, O., Kilisch, M., Schulz, C., Cruz-Zaragoza, L.D., Schwappach, B., et al. (2021). Mapping protein interactions in the active TOM-TIM23 supercomplex. *Nat. Commun.* 12, 5715.

Ieva, R., Schrempp, S.G., Opaliński, Ł., Wollweber, F., Höß, P., Heißwolf, A.K., Gebert, M., Zhang, Y., Guiard, B., Rospert, S., et al. (2014). Mgr2 functions as lateral gatekeeper for preprotein sorting in the mitochondrial inner membrane. *Mol. Cell* 56, 641–652.

Lohret, T.A., Jensen, R.E., and Kinnally, K.W. (1997). Tim23, a protein import component of the mitochondrial inner membrane, is required for normal activity of the multiple conductance channel, *J. Cell Biol.* *137*, 377–386.

Martinez-Caballero, S., Grigoriev, S.M., Herrmann, J.M., Campo, M.L., and Kinnally, K.W. (2007). Tim17p regulates the twin pore structure and voltage gating of the mitochondrial protein import complex TIM23. *J. Biol. Chem.* *282*, 3584–3593.

Matta, S.K., Kumar, A., and D’Silva, P. (2020). Mgr2 regulates mitochondrial preprotein import by associating with channel-forming Tim23 subunit. *Mol. Biol. Cell* *31*, 1112–1123.

Meinecke, M., Wagner, R., Kovermann, P., Guiard, B., Mick, D.U., Hutu, D.P., Voos, W., Truscott, K.N., Chacinska, A., Pfanner, N., et al. (2006). Tim50 maintains the permeability barrier of the mitochondrial inner membrane. *Science* *312*, 1523–1526.

Moro, F., Sirrenberg, C., Schneider, H.-C., Neupert, W., and Brunner, M. (1999). The TIM17-23 preprotein translocase of mitochondria: composition and function in protein transport into the matrix. *EMBO J.* *18*, 3667–3675.

Popov-Čeleketić, D., Mapa, K., Neupert, W., and Mokranjac, D. (2008). Active remodelling of the TIM23 complex during translocation of preproteins into mitochondria. *EMBO J.* *27*, 1469–1480.

Qi, L., Wang, Q., Guan, Z., Wu, Y., Shen, C., Hong, S., Cao, J., Zhang, X., Yan, C., and Yin, P. (2021). Cryo-EM structure of the human mitochondrial translocase TIM22 complex. *Cell Res.* *31*, 369–372.

Ryan, K.R., Leung, R.S., and Jensen, R.E. (1998). Characterization of the mitochondrial inner membrane translocase complex: the Tim23p hydrophobic domain interacts with Tim17p but not with other Tim23p molecules. *Mol. Cell. Biol.* *18*, 178–187.

Tamura, Y., Harada, Y., Shiota, T., Yamano, K., Watanabe, K., Yokota, M., Yamamoto, H., Sesaki, H., and Endo, T. (2009). Tim23–Tim50 pair coordinates functions of translocators and motor proteins in mitochondrial protein import. *J. Cell Biol.* *184*, 129–141.

Truscott, K.N., Kovermann, P., Geissler, A., Merlin, A., Meijer, M., Driessen, A.J.M., Rassow, J., Pfanner, N., and Wagner, R. (2001). A presequence- and voltage-sensitive channel of the mitochondrial preprotein translocase formed by Tim23. *Nat. Struct. Biol.* *8*, 1074–1082.

Zhang, Y., Ou, X., Wang, X., Sun, D., Zhou, X., Wu, X., Li, Q., and Li, L. (2021). Structure of the mitochondrial TIM22 complex from yeast. *Cell Res.* *31*, 366–368.

Zhou, S., Ruan, M., Li, Y., Yang, J., Bai, S., Richter, C., Schwalbe, H., Xie, C., Shen, B., and Wang, J. (2021). Solution structure of the voltage-gated Tim23 channel in complex with a mitochondrial presequence peptide. *Cell Res.* *31*, 821–824.

**Supplementary Table 1. List of yeast strains**

| Name    | Genotype/Description                                                                                            | Reference                         |
|---------|-----------------------------------------------------------------------------------------------------------------|-----------------------------------|
| BY4741  | <i>MATa his3-1, leu2-0, met15-0, ura3-0</i>                                                                     | Horizon Discovery                 |
| yMLT62  | <i>MATa leu2-0::pACT1-GEV::HIS3, rps9Δ, mek1Δ, his3-1, met15-0, ura3-0</i>                                      | A gift from J. Thorner            |
| R1158   | BY4741 <i>URA::P<sub>CMV</sub>-tTA</i>                                                                          | Horizon Discovery                 |
| W303-1A | <i>MATa leu2-3/112, ura3-1, trp1-1, his3-11/15, ade2-1, can1-100</i>                                            | A gift from J. Thorner            |
| ySS150  | W303-1A <i>URA3::P<sub>CMV</sub>-tTA</i>                                                                        | This study                        |
| ySS078  | yMLT62 <i>TIM17-3C-Spot::HphMX</i>                                                                              | ED Fig. 1b, 3b and c              |
| ySS025  | yMLT62 <i>ura3-0::pSS011(Tim23/17-Spot/50/44/21)::URA3</i><br><i>HO::pSS015(Pam16/17/18/Mgr2)::LEU2</i>         | ED Fig. 1c                        |
| ySS055  | yMLT62 <i>ura3-0::pSS077(Tim23/17-Spot/44[-GS])::URA3</i><br><i>HO::pSS082(Pam16/18)::LEU2</i>                  | ED Fig. 2                         |
| ySS121  | BY4741 <i>TIM50-HA::NatMX TIM23-Myc::HphMX</i>                                                                  | ED Fig. 6h                        |
| ySS171  | W303-1A <i>TIM17-HA::NatMX TIM23-Myc::HphMX</i>                                                                 | Fig. 3c, and ED Fig. 8a, b, and d |
| ySS176  | yMLT62 <i>TIM17-3C-Spot::HphMX ura3-0::pSS219(pALD6-Tim44 (-GS)-tENO1)::URA3</i>                                | ED Fig. 3a-c                      |
| ySS183  | yMLT62 <i>TIM17-3C-Spot::HphMX tim21Δ::LEU2</i>                                                                 | ED Fig. 3b and c                  |
| ySS184  | yMLT62 <i>TIM17-3C-Spot::HphMX ura3-0::pSS219(pALD6-Tim44 (-GS)-tENO1)::URA3 tim21Δ::LEU2</i>                   | ED Fig. 3b-d                      |
| ySS199  | W303-1A <i>TIM17-HA::NatMX TIM23-Myc::HphMX mgr2Δ::URA3</i>                                                     | Fig. 3e, ED Fig. 8b-d, 9e-h       |
| ySS204  | W303-1A <i>TIM17-HA::NatMX TIM23-Myc::HphMX mgr2Δ::URA3</i><br><i>HO::pSS254(pMGR2-Strep-Mgr2-tMGR2)::KanMX</i> | ED Fig. 8b and c                  |
| ySS205  | W303-1A <i>TIM17-HA::NatMX TIM23-Myc::HphMX mgr2Δ::URA3</i><br><i>HO::pSS241(pALD6-Strep-Mgr2-tMGR2)::KanMX</i> | Fig. 3c and g, ED Fig. 8b-i, 9j   |
| ySS207  | W303-1A <i>TIM17-HA::NatMX TIM23-Myc::HphMX mgr2Δ::URA3</i><br><i>HO::pSS239(pMGR2-Mgr2-tMGR2)::KanMX</i>       | ED Fig. 8b                        |
| yYC17a  | R1158 <i>P<sub>TIM17</sub>::KanMX-tetO7-P<sub>CYC1</sub></i>                                                    | Fig. 2f, ED Fig. 6a-g             |
| yYC17b  | ySS150 <i>P<sub>TIM17</sub>::KanMX-tetO7-P<sub>CYC1</sub></i>                                                   | Fig. 3d, ED Fig. 9a-d             |
| yYC23a  | R1158 <i>P<sub>TIM23</sub>::KanMX-tetO7-P<sub>CYC1</sub></i>                                                    | ED Fig. 6m                        |
| yYC23b  | ySS150 <i>P<sub>TIM23</sub>::KanMX-tetO7-P<sub>CYC1</sub></i>                                                   | Fig. 3d, ED Fig. 9a,b             |
| yYC02   | BY4741 <i>TIM17-HA::NatMX TIM23-Myc::HphMX</i>                                                                  | Fig. 2h, ED Fig. 6k               |
| yYC03   | BY4741 <i>TIM17-HA::NatMX TIM23-Myc::HphMX HO::pTIM17(WT)-Spot::LEU2</i>                                        | Fig. 2h, ED Fig. 6k               |
| yYC04   | BY4741 <i>TIM17-HA::NatMX TIM23-Myc::HphMX HO::tim17(D17N/E126Q)-Spot::LEU2</i>                                 | Fig. 2h, ED Fig. 6k               |
| yYC05   | BY4741 <i>TIM17-HA::NatMX TIM23-Myc::HphMX HO::tim17(D76N/E126Q)-Spot::LEU2</i>                                 | Fig. 2h, ED Fig. 6k               |

**Supplementary Table 2. List of plasmids**

| Name                             | Description                                                                                                                                                             | Reference      |
|----------------------------------|-------------------------------------------------------------------------------------------------------------------------------------------------------------------------|----------------|
| pYTK001 to pYTK096               | Original MoClo YTK plasmids                                                                                                                                             | Ref. 51        |
| pYTK-e105                        | <i>HO</i> integration vector containing a <i>KanMX</i> marker. Assembled from pYTK094, pYTK008, pYTK047, pYTK073, pYTK077, pYTK088, and pYTK090.                        | This study     |
| pYTK-e106                        | <i>HO</i> integration vector containing a <i>LEU2</i> marker. Assembled from pYTK094, pYTK008, pYTK047, pYTK073, pYTK075, pYTK088, and pYTK090.                         | Lab collection |
| pYTK-e112                        | CEN/ARS plasmid containing a <i>LEU2</i> marker. Assembled from pYTK084, pYTK008, pYTK047, pYTK073, pYTK075, and pYTK081.                                               | Lab collection |
| pYTK-e113                        | CEN/ARS plasmid containing a <i>HIS3</i> marker. Assembled from pYTK084, pYTK008, pYTK047, pYTK073, pYTK076, and pYTK081.                                               | This study     |
| pYTK-e115                        | CEN/ARS plasmid containing a <i>NatMX</i> marker. Assembled from pYTK084, pYTK008, pYTK047, pYTK073, pYTK078, and pYTK081.                                              | This study     |
| pYTK-e122                        | 2 $\mu$ plasmid containing a <i>LEU2</i> marker. Assembled from pYTK084, pYTK008, pYTK047, pYTK073, pYTK075, and pYTK082.                                               | This study     |
| pYTK-e201                        | MoClo YTK part (type 4a) for 3C-2xSpot (Amino acid sequence: GSASGTLEVLFGPTASGPDRVRA-VSHWSSGGGGSTPDRVRAVSHWSS*; also see Supplementary Table 4)                         | This study     |
| pYTK-e203                        | MoClo YTK part (type 4a) for 7xHis (Amino acid sequence: SGHHHHHHH*; also see Supplementary Table 4)                                                                    | This study     |
| pYTK001-Tim23                    | MoClo YTK part (type 3) for Tim23 (also see Supplementary Table 4)                                                                                                      | This study     |
| pYTK001-Tim17                    | MoClo YTK part (type 3) for Tim17 (also see Supplementary Table 4)                                                                                                      | This study     |
| pYTK001-Tim50                    | MoClo YTK part (type 3) for Tim50 (also see Supplementary Table 4)                                                                                                      | This study     |
| pYTK001-Tim44                    | MoClo YTK part (type 3) for Tim44 (also see Supplementary Table 4)                                                                                                      | This study     |
| pYTK001-Tim44 (–GS)              | MoClo YTK part (type 3) for Tim44 (contains a stop codon after the last amino acid; thus, a GlySer linker is absent at the C-terminus) (also see Supplementary Table 4) | This study     |
| pYTK001-Tim21                    | MoClo YTK part (type 3) for Tim21 (also see Supplementary Table 4)                                                                                                      | This study     |
| pYTK001-Pam16                    | MoClo YTK part (type 3) for Pam16 (also see Supplementary Table 4)                                                                                                      | This study     |
| pYTK001-Pam17                    | MoClo YTK part (type 3) for Pam17 (also see Supplementary Table 4)                                                                                                      | This study     |
| pYTK001-Pam18                    | MoClo YTK part (type 3) for Pam18 (also see Supplementary Table 4)                                                                                                      | This study     |
| pYTK001-Mgr2                     | MoClo YTK part (type 3) for Mgr2 (also see Supplementary Table 4)                                                                                                       | This study     |
| pYTK001-Strep-Mgr2- <i>tMGR2</i> | MoClo YTK part (type 3) for Strep-Mgr2- <i>tMGR2</i> (also see Supplementary Table 4)                                                                                   | This study     |
| pYTK095-Tim23                    | MoClo YTK expression cassette for <i>pGAL1</i> -Tim23. Assembled from pYTK095, pYTK002, pYTK030, pYTK001-Tim23, pYTK051, and pYTK067.                                   | This study     |
| pYTK095-Tim23-Spot               | MoClo YTK expression cassette for <i>pGAL1</i> -Tim23-Spot. Assembled from pYTK095, pYTK002, pYTK030, pYTK001-Tim23, pYTK-e201, pYTK061, and pYTK067.                   | This study     |
| pYTK095-Tim17                    | MoClo YTK expression cassette for <i>pGAL1</i> -Tim17. Assembled from pYTK095, pYTK003, pYTK030, pYTK001-Tim17, pYTK051, and pYTK068.                                   | This study     |
| pYTK095-Tim17-Spot               | MoClo YTK expression cassette for <i>pGAL1</i> -Tim17-Spot. Assembled from pYTK095, pYTK003, pYTK030, pYTK001-Tim17, pYTK-e201, pYTK061, and pYTK068.                   | This study     |

|                     |                                                                                                                                                                              |                            |
|---------------------|------------------------------------------------------------------------------------------------------------------------------------------------------------------------------|----------------------------|
| pYTK095-Tim50       | MoClo YTK expression cassette for <i>pGAL 1</i> -Tim50. Assembled from pYTK095, pYTK004, pYTK030, pYTK001-Tim50, pYTK051, and pYTK069.                                       | This study                 |
| pYTK095-Tim44       | MoClo YTK expression cassette for <i>pGAL 1</i> -Tim44. Assembled from pYTK095, pYTK005, pYTK030, pYTK001-Tim44, pYTK051, and pYTK070.                                       | This study                 |
| pYTK095-Tim44 (–GS) | MoClo YTK expression cassette for <i>pGAL 1</i> -Tim44 (contains a stop codon after the last amino acid; thus, a GlySer linker is absent at the C-terminus).                 | This study                 |
| pYTK095-Tim21       | MoClo YTK expression cassette for <i>pGAL 1</i> -Tim21. Assembled from pYTK095, pYTK006, pYTK030, pYTK001-Tim21, pYTK051, and pYTK071.                                       | This study                 |
| pYTK095-Pam16       | MoClo YTK expression cassette for <i>pGAL 1</i> -Pam16. Assembled from pYTK095, pYTK002, pYTK030, pYTK001-Pam16, pYTK052, and pYTK067.                                       | This study                 |
| pYTK095-Pam17       | MoClo YTK expression cassette for <i>pGAL 1</i> -Pam17. Assembled from pYTK095, pYTK003, pYTK030, pYTK001-Pam17, pYTK052, and pYTK068.                                       | This study                 |
| pYTK095-Pam18       | MoClo YTK expression cassette for <i>pGAL 1</i> -Pam18. Assembled from pYTK095, pYTK004, pYTK030, pYTK001-Pam18, pYTK052, and pYTK069.                                       | This study                 |
| pYTK095-Mgr2        | MoClo YTK expression cassette for <i>pGAL 1</i> -Mgr2. Assembled from pYTK095, pYTK005, pYTK030, pYTK001-Mgr2, pYTK052, and pYTK070.                                         | This study                 |
| pYTK095 L2-RE       | MoClo YTK filler cassette (ConL2-Spacer-ConRE). Assembled from pYTK095, pYTK004, pYTK048, and pYTK072.                                                                       | This study                 |
| pYTK095 L3-RE       | MoClo YTK filler cassette (ConL3-Spacer-ConRE). Assembled from pYTK095, pYTK005, pYTK048, and pYTK072.                                                                       | This study                 |
| pYTK095 L4-RE       | MoClo YTK filler cassette (ConL4-Spacer-ConRE). Assembled from pYTK095, pYTK006, pYTK048, and pYTK072.                                                                       | This study                 |
| pYTK095 L5-RE       | MoClo YTK filler cassette (ConL5-Spacer-ConRE). Assembled from pYTK095, pYTK007, pYTK048, and pYTK072.                                                                       | This study                 |
| pYTK095 LS-R1       | MoClo YTK filler cassette (ConLS-Spacer-ConR1). Assembled from pYTK095, pYTK002, pYTK048, and pYTK067.                                                                       | This study                 |
| pSS011              | pYTK096 (Tim23, Tim17-Spot, Tim50, Tim44, Tim21). Assembled from pYTK096, pYTK095-Tim23, pYTK095-Tim17-Spot, pYTK095-Tim50, pYTK095-Tim44, pYTK095-Tim21, and pYTK095-L5-RE. | ED Fig. 1c                 |
| pSS015              | pYTK-e106 (Pam16, Pam17, Pam18, Mgr2). Assembled from pYTK-e106, pYTK095-Pam16, pYTK095-Pam17, pYTK095-Pam18, pYTK095-Mgr2, and pYTK095 L4-RE.                               | ED Fig. 1c                 |
| pSS077              | pYTK096 (Tim23, Tim17-Spot, Tim44 (–GS)). Assembled from pYTK096, pYTK095-Tim23, pYTK095-Tim17-Spot, pYTK095 L2-R3 (spacer), pYTK095-Tim44 (–GS), and pYTK095 L4-RE.         | ED Fig. 2                  |
| pSS082              | pYTK-e106 (Pam16, Pam18). Assembled from pYTK-e106, pYTK095-Pam16, pYTK095 L1-R2 (spacer), pYTK095-Pam18, and pYTK095 L3-RE.                                                 | ED Fig. 2                  |
| pSS122              | pYTK-e112 <i>pTIM17</i> -Tim17-Spot (also see Supplementary Table 4)                                                                                                         | ED Fig. 6h                 |
| pSS219              | pYTK096 <i>pALD6</i> -Tim44 (–GS)- <i>tENO1</i> . Assembled from pYTK096, pYTK018, pYTK001-Tim44 (–GS), and pYTK051                                                          | ED Fig. 3a-d               |
| pSS239              | pYTK-e105 <i>pMGR2</i> -Mgr2- <i>tMGR2</i> (also see Supplementary Table 4)                                                                                                  | ED Fig. 8b                 |
| pSS241              | pYTK-e105 <i>pALD6</i> -Strep-Mgr2- <i>tMGR2</i> . Assembled from pYTK-e105, pYTK018, and pYTK001-Strep-Mgr2- <i>tMGR2</i>                                                   | Fig. 3g, ED Figs. 8b-d, 9j |
| pSS254              | pYTK-e105 <i>pMGR2</i> -Strep-Mgr2- <i>tMGR2</i> (also see Supplementary Table 4)                                                                                            | ED Fig. 8 b and c          |
| pSS277              | pYTK-e113 <i>pALD6</i> -Strep-Mgr2- <i>tMGR2</i>                                                                                                                             | Fig. 3e, ED Fig. 9e-h      |
| pSS070              | pETDuet-1 6xHis-3C-Tim44-CTD (residues 210–431) (also see Supplementary Table 4)                                                                                             | This study                 |



|                    |                                                                                     |                                         |
|--------------------|-------------------------------------------------------------------------------------|-----------------------------------------|
| SNRtRNA/pBpaRS TRP | Plasmid to incorporate Bpa into an amber codon                                      | Ref. 65                                 |
| pYC17a             | pYTK-e115 <i>pTIM17</i> -Tim17-HA (also see Supplementary Table 4)                  | Fig. 2f, ED Fig. 6a-c                   |
| pYC17b             | pYTK-e122 <i>pDDI2</i> -Tim17-HA (also see Supplementary Table 4)                   | ED Fig. 6d-g                            |
| pYC23              | pYTK-e115 <i>pTIM23</i> -Tim23-HA (also see Supplementary Table 4)                  | ED Fig. 6m                              |
| pYC002             | pET32a <i>Cyb2Δ</i> -DHFR (also see Supplementary Table 4)                          | Fig. 2h, ED Fig. 6i-k                   |
| pYC003             | pYTK-e113 <i>pTIM17</i> -Tim17-Spot                                                 | Fig. 3d, ED Fig. 9a-d                   |
| pYC008             | pYTK-e123 <i>pTIM23</i> -Tim23-Spot (also see Supplementary Table 4)                | Fig. 3d, ED Fig. 9a,b                   |
| pYC005             | pYTK-e112 <i>pGAL 1</i> -Grx5-S80-sfGFP (also see Supplementary Table 4)            | Fig. 3c-e, g, ED Fig. 8d-i, and 9a-h, j |
| pYC006             | pYTK-e112 <i>pGAL 1</i> -Grx5-S99(TM)-sfGFP (also see Supplementary Table 4)        | ED Fig. 8d                              |
| pYC007             | pYTK-e112 <i>pGAL 1</i> -Grx5-S80-sfGFP-2xTEV-ALFA (also see Supplementary Table 4) | ED Fig. 8a                              |

**Supplementary Table 3. List of primers**

| Name    | Sequence (including notes)                                                                                                                                                                                                                                                                                                 |
|---------|----------------------------------------------------------------------------------------------------------------------------------------------------------------------------------------------------------------------------------------------------------------------------------------------------------------------------|
| EP_442  | GATGCACTAAGAGGCAAACATGAC<br>(To confirm chromosomal integration at <i>TIM23</i> locus)                                                                                                                                                                                                                                     |
| EP_443  | GGACGGCTCTGACAGTTTCG<br>(To confirm chromosomal integration at <i>TIM23</i> locus)                                                                                                                                                                                                                                         |
| EP_446  | GTTGGAGGCATACAAGGAACAG<br>(To confirm chromosomal integration at <i>TIM17</i> locus)                                                                                                                                                                                                                                       |
| EP_447  | GCACTAGCTTTTGGCTTGTTG<br>(To confirm chromosomal integration at <i>TIM17</i> locus)                                                                                                                                                                                                                                        |
| EP_450  | AGAATACAGCAGGAGCAAATGG<br>(To confirm chromosomal integration at <i>TIM50</i> locus)                                                                                                                                                                                                                                       |
| EP_451  | GCATCAGATCATTAGGTGTGTCTACATC<br>(To confirm chromosomal integration at <i>TIM50</i> locus)                                                                                                                                                                                                                                 |
| SS_1696 | cctcttactctcttgcctgtacatactacacgttatagcgttaacaaaagcagatagGGCGTTAGTATCGAATCG<br>(To replace the endogenous <i>TIM23</i> promoter with the TRE promoter. Uppercase for sequence specific to TRE-kanMX and lower case for sequences homologous to yeast chromosomal sequences directly before the starting codon of Tim23)    |
| SS_1697 | ttggccgccacggcagcattcgcacatcggttaggtgtcttatctccaaaagccacgacatGGATCCCCGAATTG<br>(To replace the endogenous <i>TIM23</i> promoter with the TRE promoter. Uppercase for sequence specific to TRE-kanMX and lower case for sequences homologous to the N-terminus of Tim23)                                                    |
| SS_1698 | GGTTATTGCATTCGCC<br>(To confirm chromosomal integration of the TRE cassette into the <i>TIM23</i> locus)                                                                                                                                                                                                                   |
| SS_1699 | CAGGACCTGATATTATGTTATTG<br>(To confirm chromosomal integration of the TRE cassette into the <i>TIM23</i> locus)                                                                                                                                                                                                            |
| SS_1700 | ccaaatccagaggataaaagcactattctcatcaaaagatggaaaagctgtgaaagagtcGGCGTTAGTATCGAATCG<br>(To replace the endogenous <i>TIM17</i> promoter with the TRE promoter. Uppercase for sequence specific to TRE-kanMX and lower case for sequences homologous to yeast chromosomal sequences directly before the starting codon of Tim17) |
| SS_1701 | agcaccaccgaaatcatttagttagtactataggacatggatctctcgaatgatcggtgacatGGATCCCCGAATTG<br>(To replace the endogenous <i>TIM17</i> promoter with the TRE promoter. Uppercase for sequence specific to TRE-kanMX and lower case for sequences homologous to the N-terminus of Tim17)                                                  |
| SS_1702 | ACTGCTATTGTTCAACAAAG<br>(To confirm chromosomal integration of the TRE cassette into the <i>TIM17</i> locus)                                                                                                                                                                                                               |
| SS_1703 | GCTCACCTAATGGCG<br>(To confirm chromosomal integration of the TRE cassette into the <i>TIM17</i> locus)                                                                                                                                                                                                                    |
| SS_1942 | CTCGGTCCTCTCGCT<br>(To confirm chromosomal deletion of <i>TIM21</i> )                                                                                                                                                                                                                                                      |
| SS_2337 | gcacgtctcatcgggtctCATATGCTGAAATACAAACCT<br>(To clone Cyb2Δ-sfGFP into pYTK001)                                                                                                                                                                                                                                             |
| SS_2341 | atgccgtctcagggtctcaggatccGCCCTTGTATAACTCGT<br>(To clone Cyb2Δ-sfGFP into pYTK001)                                                                                                                                                                                                                                          |
| SS_2455 | gaaagaattcGATTCACAATGTCTACCTGTA<br>(To amplify a DNA segment expressing Mgr2 and the endogenous <i>MGR2</i> promoter with a 5' <i>EcoRI</i> site)                                                                                                                                                                          |
| SS_2456 | gaaactgcagtgcggatccATTGTCTATTATATGCTTTGGTTC<br>(To amplify a DNA segment expressing Mgr2 and the endogenous <i>MGR2</i> promoter with a 3' <i>PstI</i> site)                                                                                                                                                               |
| SS_2578 | ataaaggatacagaagcagtgaaaagatgttcagctctactaggtcaaacctgagggcgCTGTGGATAACCGTAGTC<br>G<br>(To replace the endogenous <i>TIM21</i> gene with a selection marker from MoClo YTK. Uppercase for sequence specific to selection marker and lower case for sequences homologous to <i>TIM21</i> )                                   |

|         |                                                                                                                                                                                                                                                                                       |
|---------|---------------------------------------------------------------------------------------------------------------------------------------------------------------------------------------------------------------------------------------------------------------------------------------|
| SS_2579 | tgtaaggccaacacgtataacaggtgatacacatagaagacacgtggaaataacagtcGGGCGTTTTTTATTGGTC<br>(To replace the endogenous <i>TIM21</i> gene with a selection marker from MoClo YTK. Uppercase for sequence specific to selection marker and lower case for sequences homologous to <i>TIM21</i> )    |
| SS_2580 | GGTGTACATTATATGCGTCATGTCT<br>(To confirm chromosomal deletion of <i>TIM21</i> )                                                                                                                                                                                                       |
| YC_1760 | gaaagaattcCTCCAGCATTATAAAGC<br>(To amplify a DNA segment expressing Tim17 with a 5' <i>EcoRI</i> site)                                                                                                                                                                                |
| YC_1761 | gaaaggatccAGTTTCTGCACTAGC<br>(To amplify the expression cassette of Tim17 with a 3' <i>BamHI</i> site)                                                                                                                                                                                |
| YC_1762 | gaaagaattcATTGAAAAAAGAGAAAATACTG<br>(To amplify a DNA segment expressing Tim23 with a 5' <i>EcoRI</i> site)                                                                                                                                                                           |
| YC_1763 | gaaaggatccGCCATCGAAAACAATAG<br>(To amplify a DNA segment expressing Tim23 with a 3' <i>BamHI</i> site)                                                                                                                                                                                |
| YC_1981 | gaaagaattcCAGCCCACATACTAC<br>(To amplify a DNA segment of the <i>DDI2</i> promoter with a 5' <i>EcoRI</i> site)                                                                                                                                                                       |
| YC_1982 | gaaaggtaccGATTGATTCTTTTGAAGAGAAG<br>(To amplify a DNA segment of the <i>DDI2</i> promoter with a 3' <i>KpnI</i> site)                                                                                                                                                                 |
| YC_2425 | agaccaacattaccaaacagactccactactttccataagaaggaagcagacacaccaCTGTGGATAACCGTAGT<br>CG<br>(To replace the endogenous <i>MGR2</i> gene with a selection marker from MoClo YTK. Uppercase for sequence specific to selection marker and lower case for sequences homologous to <i>MGR2</i> ) |
| YC_2426 | ggaagcgtaaatatgcaaaattccccctcagtccttacgtataccgtattggcagcGGGCGTTTTTTATTGGTC<br>(To replace the endogenous <i>MGR2</i> gene with a selection marker from MoClo YTK. Uppercase for sequence specific to selection marker and lower case for sequences homologous to <i>MGR2</i> )        |
| YC_2427 | GCAGATAAGTAACAATGTTTAAG<br>(To confirm chromosomal deletion of <i>MGR2</i> )                                                                                                                                                                                                          |
| YC_2521 | CCAAATTACTACAACCTTCGTAATTCGAG<br>(To confirm chromosomal deletion of <i>MGR2</i> )                                                                                                                                                                                                    |

### Supplementary Table 4. DNA sequences

(Note, sequences are inserts only; the plasmid backbones are not included.)

| Name                                                                                             | DNA sequence                                                                                                                                                                                                                                                                                                                                                                                                                                                                                                                                                                                                                                                                                                                                                                                                                                                                                                                                                                                                                                                                                                                                                                                                                                                                                                                                                                                                                                                                                                                                                                                                                                                                                                                                                                                                                                                                                                                                                                                                                                                                                                                                                                                                                                                                                                                                                                                                                                  | Reference  |
|--------------------------------------------------------------------------------------------------|-----------------------------------------------------------------------------------------------------------------------------------------------------------------------------------------------------------------------------------------------------------------------------------------------------------------------------------------------------------------------------------------------------------------------------------------------------------------------------------------------------------------------------------------------------------------------------------------------------------------------------------------------------------------------------------------------------------------------------------------------------------------------------------------------------------------------------------------------------------------------------------------------------------------------------------------------------------------------------------------------------------------------------------------------------------------------------------------------------------------------------------------------------------------------------------------------------------------------------------------------------------------------------------------------------------------------------------------------------------------------------------------------------------------------------------------------------------------------------------------------------------------------------------------------------------------------------------------------------------------------------------------------------------------------------------------------------------------------------------------------------------------------------------------------------------------------------------------------------------------------------------------------------------------------------------------------------------------------------------------------------------------------------------------------------------------------------------------------------------------------------------------------------------------------------------------------------------------------------------------------------------------------------------------------------------------------------------------------------------------------------------------------------------------------------------------------|------------|
| pYTK-e201<br>(backbone: pYTK-001)                                                                | GGTCTCAatccgtagtggtaccctggaggtgatttcagggccgactgtagcggccctgatagagtagagcagtct<br>cacatggtctctggtgaggttctggcgggtggtcaactccagatagagtagctgctgtttctcactggagttcctaagctGA<br>GACC<br>(Uppercase, <i>Bsal</i> sites)                                                                                                                                                                                                                                                                                                                                                                                                                                                                                                                                                                                                                                                                                                                                                                                                                                                                                                                                                                                                                                                                                                                                                                                                                                                                                                                                                                                                                                                                                                                                                                                                                                                                                                                                                                                                                                                                                                                                                                                                                                                                                                                                                                                                                                   | This study |
| pYTK-e203<br>(backbone: pYTK-001)                                                                | GGTCTCAatccggtcaccatcaccacatcatcactaatggctGAGACC<br>(Uppercase, <i>Bsal</i> sites)                                                                                                                                                                                                                                                                                                                                                                                                                                                                                                                                                                                                                                                                                                                                                                                                                                                                                                                                                                                                                                                                                                                                                                                                                                                                                                                                                                                                                                                                                                                                                                                                                                                                                                                                                                                                                                                                                                                                                                                                                                                                                                                                                                                                                                                                                                                                                            | This study |
| TIM17-3C-Spot<br>(PCR product to<br>introduce a Spot-<br>tag to<br>chromosomal<br><i>TIM17</i> ) | GATATGCTGCTTGGCAAGCCAAACCTATGGCTCCTCCTTTGCCGAAGCACCTTCCT<br>CTCAACCTCTGCAAGCTgctagtggtaccctggaggtgtatttcagggccgactgtagcggccctgatagagt<br>tagagcagctcacattggtctctggtggaggttctggcgggtggtcaactccagatagagtagctgctgtttctcactggagttc<br>ttgataagcgcgccactctaaataagcgaatttcttattgattatgattttattataaataagttataaaaaaaaaaagtata<br>caaaatataaagtactcttaggttttaaacgaaaattcttattcttgagtaactcttctgtaggtcaggttcttctcaggtata<br>gtatgaggtcgtcttattgaccacacctctaccggcagatccgctaggataacagggtaatatagatctgtttagctgctc<br>gtccccgcccgggtcaccggccagcagcatggaggcccagaataccctcctgacagctttagctgctgagcagctcagggg<br>catgatgtagctgtcggcgtacattagccatacatcccattgataatcattgcatcacaattttgatggccgacggcg<br>cgaagcaaaaattacggctcctcgtcggacctgcgagcagggaacgctccccacagacgcgttgaattgtccca<br>cgccgcccctgtagagaataataaagggttaggttccactgaggttcttctcatatacttctttaaactctgtagg<br>atacagttctcacatcacatccgaacataaacaacc <u>atggg</u> taaaaagcctgaactcaccgagcgtctgtagaagtttc<br>tgatcgaaaagttcgacagcgtctccgacctgtagcagctctcggaggcgaagaatctcgtgtttcagcttctgtagga<br>ggcgtggatgtcctcgggtaaatagctgcgcccgtggttctacaagatcgttattatcggcactttgcatcggccg<br>cgctcccattccggaagtgtgacattgggaattcagcagagcctgacatttcatctcccggcgtgacaggggtgc<br>acgttcaaacctcctgaaacgaactcccgtgttctcagcggctcggaggccatggatgcatcgtcgtcggcc<br>gatcttagccagacgagcgggttcggcccattcggaccgaaggaaatcgttaatacactacatggcgtgatttcatacg<br>cgattgctgacccatgtatcactggcaactgtgtagcagacaccgctcagctgctcgtcggcaggtctcgtatgag<br>ctgatgcttgggcccaggactgccccgaagtcggcaccctcgtgacgaggatttcggctccaacaatgtcctgacggaca<br>atggccgataaacagcggctcattgactggagcagggcaggttctggggattccaatacagaggtcgaacatcttctctg<br>agggcgtggtgctgtatggagcagcagacgcgctactcagcggaggcagcagctcggagctgtaggagcgcggcgtc<br>cggcgtatattgctccgattggtctgaccaactctatcagagcgtggtgacggcaattcagatgtagcagcttgggcccag<br>ggctgtagcagcgaatcgtccgatccggagccgggactgctgggctacacaaatcggccgagaaagcggccgctc<br>ggaccgatggctgtgagaagtactgccgatagtggaaccgacgccccagcactcgtccgagggcaaaaggaa <u>taatc</u><br>agtactgacaataaaaagattctgtttcaagaactgtcattgtatagtttttataatgtagtgttctttaaatacaatgtagc<br>gtgattataattttttcgcctcagatcatctgccagatgccaagtaagtgccgagaagaatataatcagctcaatcgtatg<br>gaatgctggtcgtatagctgctgattcagatacaccgcccattccagctgcaaaacgagctccaattcatcgtatgat<br>cagatccactagtgccctatgcccGACGTATCGACTAGCCTCCTTTACGTTTTTACTTTATTTT<br>AGCCTTTTATTTCAAGATTACCAACCATTTCTC<br>(Uppercase, homology arms; bold/underlined, start and stop codons of hygromycin B<br>phosphotransferase) | This study |
| TIM17-HA<br>(PCR product to<br>introduce an HA-<br>tag to<br>chromosomal<br><i>TIM17</i> )       | GATATGCTGCTTGGCAAGCCAAACCTATGGCTCCTCCTTTGCCGAAGCACCTTCCT<br>CTCAACCTCTGCAAGCTgctggaggggctaccacggctagtggtaccggcgaataattatacttcaaggtactg<br>ctagcggggcggttctatccctatgacgtcccggactatgcaggatcctatccatagcgttccagattacgcttaaggcg<br>cgccactctaaataagcgaatttcttattgattatgattttatataaataagttataaaaaaaaaaagtatacaaaatataa<br>gtgactcttaggttttaaacgaaaattcttattcttgagtaactcttctgtaggtcaggttcttctcaggtatagatgaggtcg<br>ctcttattgaccacacctctaccggcagatccgctaggataacagggtaatatagatctgttttagctgctcctcctcccggc<br>gtcaccggccagcagcatggaggcccagaataccctcctgacagcttgcagctgcgagctcagggcagtgatgtagct<br>gtcggccgtacatttagccatacatcccattgataatcattgcatccatacattttgatggccgacggcgcggaagcaaaa<br>attacggtcctcgtcagacactcggagcagggaacgctccccacagacgcgttgaattgtcccacgcccggcccc<br>ttagagaataataaagggttaggttggcactgaggttcttctcatatacttctttaaactctgtaggatacagttctcac<br>atcacatccgaacataaacaacc <u>atggg</u> taccactctgacgacacggcttaccggtagccaccaggtccccgggggac<br>gcccaggccatcagggcactggatgggtcctcaccaccgacaccgtctccgctgaccgccaccggggaacggctcac<br>cctcggggaggtgcccgtgaccccggcctgaccaaggtgtccccgacgacgaatcggagcgaatcggagcaggg<br>ggaggacggcagcccggactcccggactgctgctgctgacgggacgagcggcagcctgcccgggctcgtggtcgtcgt<br>actcggctggaaccgcccggctgaccgtcagggacatcaggtcggccggagcaccggggcaggggctcgggctcggc<br>gcgtttaggggctcgcgacggaggtcggccggcagcggggcggccggcaccctggtgaggtcacaacgtcaacg<br>caccggcagatccacgctaccggggatggggtcaccctcgtcggcctggacaccgctgtagcagcggcaccgctc<br>gacgggagcagggcctctacatgagcagcctgccc <u>taatc</u> agtagtacaataaaaagattctgtttcaagaactg<br>tcattgtatagttttatagtagtcttatttaatacaatgtagcgtgattatatttttcgcctcagatcatctcccagat                                                                                                                                                                                                                                                                                                                                                                                                                                                                                                                                                                                                                                                                                                                                                                                                                                | This study |

|                                                                                                             |                                                                                                                                                                                                                                                                                                                                                                                                                                                                                                                                                                                                                                                                                                                                                                                                                                                                                                                                                                                                                                                                                                                                                                                                                                                                                                                                                                                                                                                                                                                                                                                                                                                                                                                                                                                                                                                                                                                                                                                                                                                                                                                                                                                                                                                                                                                                                                                                                                                         |                   |
|-------------------------------------------------------------------------------------------------------------|---------------------------------------------------------------------------------------------------------------------------------------------------------------------------------------------------------------------------------------------------------------------------------------------------------------------------------------------------------------------------------------------------------------------------------------------------------------------------------------------------------------------------------------------------------------------------------------------------------------------------------------------------------------------------------------------------------------------------------------------------------------------------------------------------------------------------------------------------------------------------------------------------------------------------------------------------------------------------------------------------------------------------------------------------------------------------------------------------------------------------------------------------------------------------------------------------------------------------------------------------------------------------------------------------------------------------------------------------------------------------------------------------------------------------------------------------------------------------------------------------------------------------------------------------------------------------------------------------------------------------------------------------------------------------------------------------------------------------------------------------------------------------------------------------------------------------------------------------------------------------------------------------------------------------------------------------------------------------------------------------------------------------------------------------------------------------------------------------------------------------------------------------------------------------------------------------------------------------------------------------------------------------------------------------------------------------------------------------------------------------------------------------------------------------------------------------------|-------------------|
|                                                                                                             | <p>gcgaagttaagtgcgcagaaagtaatatcatgctcaatcgatgtgaatgctggctctactgctgctgattcgatactaac<br/> gccgccatccagtgctgaaaacgagctcgaattcatgcatgatccactagtgccctatgctggccGACGTATC<br/> GCACTAGCCTCCTTTACGTTTTTACTTTATTTTCAGCCTTTTATTTCAAGATTACCAACC<br/> ATTTCTC<br/> (Uppercase, homology arms; bold/underlined, start and stop codons of nourseothricin N-<br/> acetyl transferase)</p>                                                                                                                                                                                                                                                                                                                                                                                                                                                                                                                                                                                                                                                                                                                                                                                                                                                                                                                                                                                                                                                                                                                                                                                                                                                                                                                                                                                                                                                                                                                                                                                                                                                                                                                                                                                                                                                                                                                                                                                                                                                                              |                   |
| <p>TIM23-myc<br/> (PCR product to<br/> introduce a myc-<br/> tag to<br/> chromosomal<br/> <i>TIM23</i>)</p> | <p>GGTTTGAAACCCATGGGTTATTCCCTCGCAATGGTGGCCGCTGCGTGCGCCGCTGCTG<br/> GTGTAAGTGTCAAGAAAAGACTACTTGAAAAAgctagtggtaccctggagggttatttcagggccgact<br/> gtagcggcgaacaaaagttgattctgaagaagattgaacggggaacaaaagctaatcctccagggaagactgtgataa<br/> ggcgcgccactctaaataagcgaattcttattgatttatttataaataagttataaaaaataagtgatacaaaatt<br/> taaagtgactcttaggttttaaacgaaaattcttattctgagtaactcttctgtaggtcaggttgcttctcaggtatagtag<br/> gtcgtcttattgaccacacctctaccggcagatccgctaggataaacagggaatagatgctgttagcttgcctgccccg<br/> ccgggtcaccggccagcagatggaggcccaaataccctcttgacagcttgacgtgagcagctcaggggcatgatg<br/> gactgtgcccgtacatttagccatacatcccatgataatcattgcatccatacattttagtgccgcacggcggaagca<br/> aaaattacggctctcgtcggacctgcgacgaggaaacgctcccctacagacgcgtgaattgtcccacgcccgcg<br/> ccccgtagagaaataaaaaggttaggttgcactgagggtctcttcatatactccttttaaatcttgcaggatacagttc<br/> tcacatcacatccgaacataaacacc<u>atggg</u>taaaaagcctgaactaccggcagctgtcgcgagaagttctgatcgaa<br/> aagttcagacgcgtctccgacctgatgacgtctcggaggcgaagaatctcgtgcttccagctcagtagtagggcgtg<br/> gatagtctcgtgggtaaatagctgcgcatggttctacaagatcgttatgcttccagcttgcacgcccgcgctcccg<br/> attccggaaggtgactgacattggggaattcagcgagagcctgacattgcatctcccgcgacaggggtgcacgttga<br/> agacctgctgaaccgaactgcccgtgttctgcagccggtcgcggaggccatggatgcatgctgcccgtgcttag<br/> ccagacgagcggggtcggccattcggaccgcaaggaatcggcaatacactacatggcgtgattcatatgcccgtgct<br/> gatccccatgtgtactgcaaacctgtgatggacgacaccgtcagtcgctcgcgacggctctcagtagcgtgatgct<br/> ttggcggcagggactgccccgaagtcggcaccctcgtgcacgaggatttcggctccaacatgctcctgacggacaatggccg<br/> cataacagcggctgactgagcagcagcgtggtgggattcccaatacagggcgcacaactcttctggaggccgt<br/> ggtggtctgtatggagcagcagcagcgtactcagcggaggcatccggagcttcagggatcgcgcggtcctccggcgt<br/> atatgctccgattgcttgaccaactctacagagcttgggtgacggcaatttcgatgatgacgttgggcgagggctcag<br/> cgacgcaatcgtccgatccggagccgggactgtcgggctacacaaatcggccgagaagcgcggccgtctggaccgat<br/> ggctgtgtagaagactcgcgtagatggaaaccgacgccccagcactctccgagggcaaggaat<u>ata</u>tcagactga<br/> caataaaaagattctgtttcaagaacttgcattgtatgtttttatattgtatgttcttatttaatacaaatgtagcgtgattata<br/> ttttttcgcctgcacatcatctgccagatcgaaagtaagtgcgagaaagtaatatcatgctcaatcgtatgtaagtgctg<br/> gtcgtactgtctgctgactgataactcagccgcatccagtgctgaaacgagctccaattcagtagatcagatcca<br/> ctagggcctatcggACTGATGGCGCTTGTATATAGCATTGAAAAATAATAGTACGTAACG<br/> CAGAAAAACAACCAATGAA<br/> (Uppercase, homology arms; bold/underlined, start and stop codons of hygromycin B<br/> phosphotransferase)</p> | <p>This study</p> |
| <p>TIM50-HA<br/> (PCR product to<br/> introduce an HA-<br/> tag to<br/> chromosomal<br/> <i>TIM50</i>)</p>  | <p>TATTTGAAAGAGGAAAAAAGAAAGAAGATTGCTGAATCCAAAAGctggaggggctaccacg<br/> gtagtggtagccggcgaataatttatacttcaaggtagctgtagcggggggggttctatccctatgacgtcccggactatgca<br/> ggatcctatccatgacgttccagattacgcttaagggcgcgaccttctaaataagcgaatttcttattgatttattaitta<br/> aataagttataaaaaaataagtgatacaaaatttaagtgactcttaggttttaaacgaaaattcttattctgagtaactcttt<br/> ccttaggtcaggttcttctcaggtatagtgagtgcttattgaccacacctctaccggcagatccgcatagggataac<br/> agggtaataatagatctgttagcttgcctcgcggggtcaccggccagcagatggaggccagaataaccctccttg<br/> acagcttgacgtgagcagctcagggcatgatgactgtcggcgtacatttagccatacatcccatgataatcatttgc<br/> atccatacattttagtgccgcaaggcgaagcaaaaattacggctcctcgtcagacactgagcagggaaacgctc<br/> ccctcacagacgctgattgtcccacgcccgtcgttagaataataaaaggttaggatttgcactgaggttctct<br/> ttcatatactccttttaaatcttctaggtatgctcaccatccatccgaacataaaacc<u>atggg</u>taccactctgacg<br/> acacggctaccggtaccgaccaggtcggggggcagcggagggcactgagggccttaccaccga<br/> caccgtctccgctaccgccaccgggggagcggctcaccctcggggagggtcgggtggaccgcccctgaccaaggtgtt<br/> ccccgacgacgaatcgagcagcaatcgacgaggggagcgggagcgggactcccggactcccggactctgctgctacg<br/> gggacgacggcagcctggcgggtctggtcgtctcgtactcgggtggaaccgcccgtgaccgtcgaggacatcgag<br/> gtcggccccggagcaccggggcaggggtcggcgcgcttggggctcgcgagggagttcggccgagcgggg<br/> cgccgggcacctctgggtgaggtcacaacgtcaacgcaccgggactccacgctaccggcgatgggttaccctct<br/> gcccgtgacaccgcccgtacgacggcaccgcccggagcggcagcggctctacatgagcatgcctgcccc<u>ta</u><br/> <u>at</u>cagtagtacaataaaaagattctgtttcaagaactgtcattttagtatttttatttagtttctttaaatacaaatgta<br/> gcgtgattatatttttcgctcgacatcatctgcccagatcgaaagtaagtgcgagaaagtaatatcatgctcaatcgt<br/> tgtgaatgctgctgatactgctgattcgataactcggccatccagtgctgaaaacgagctcgaattcatcagtagat<br/> atcagatccactagtgccatgcccCACACCCTCATTTTGTACTGTGATGTGAATAAACTTA<br/> TGAT<br/> (Uppercase, homology arms; bold/underlined, start and stop codons of nourseothricin N-<br/> acetyl transferase)</p>                                                                                                                                                                                                                                                                                                                                                                                                                                                                                                                                          | <p>This study</p> |

|                        |                                                                                                                                                                                                                                                                                                                                                                                                                                                                                                                                                                                                                                                                                                                                                                                                                                                                                                                                                                                                                                                                                                                                                                                                                                                                                                                                                                                                                                                                                                                      |            |
|------------------------|----------------------------------------------------------------------------------------------------------------------------------------------------------------------------------------------------------------------------------------------------------------------------------------------------------------------------------------------------------------------------------------------------------------------------------------------------------------------------------------------------------------------------------------------------------------------------------------------------------------------------------------------------------------------------------------------------------------------------------------------------------------------------------------------------------------------------------------------------------------------------------------------------------------------------------------------------------------------------------------------------------------------------------------------------------------------------------------------------------------------------------------------------------------------------------------------------------------------------------------------------------------------------------------------------------------------------------------------------------------------------------------------------------------------------------------------------------------------------------------------------------------------|------------|
| pYTK001-Tim23          | GGTCTCatatgctgctgcttttggagataagacacctaccgatgatgcgaatgctgccgtgggcccgaagatacaacc<br>aagcctaaggactatcgttgaagcagagtttaggttcgagccaaacatcaataacataatcaggtcctggtggaatgc<br>atgtcgacaccgctaggctcctcttggctggtctagacaagggtgaggatattagatctggaagaacaacatctct<br>cgtagaaggctcacaggtctgatccctcccgggtggaccgatgacatgttacggaccggtgccgtctacgtctgg<br>gacttggatcggagggtttctggtatgatgcagggtctacagaatattccgccaatagtcgggaaatgcaattgaaca<br>cgtcctgaatcacactaagagaggtccctcttagtaataatgcggggattctcgtgtgagtcacaatcatcaattct<br>acaatagatgactaagaggcaaacatgacaccgcggtccattggcgtgggccctcacgggctcttggcaagtct<br>caaaaggttgaaccatgggtattcctcggaatggtggccgtgcgtgcgcgtggtgtagtcaagaaaagacta<br>ctgaaaaaggatcctGAGACC<br>(Uppercase, Bsal sites)                                                                                                                                                                                                                                                                                                                                                                                                                                                                                                                                                                                                                                                                                                                                                                                                     | This study |
| pYTK001-Tim17          | GGTCTCatatgctcagccgatcattcgagagatccatgtcctatagtcataactaatgattcgtggtgcttttgcattgggtg<br>ccattggtggtgtttggcattgggattaaagggtttgaaattcgcattaggtagcgtggttcaggagctatgagcgcatt<br>aaagcgtgctcccgtactgggtgtaatttgggtggtgggtgttttttgcactttgattgctgtaaggccgttagaa<br>agagagaggaccatggaatgctatcattgacagggttttctactggtggcgttttagctgtaagaggtggtggaggcataca<br>aggaacagttcgatcagctgtgcttgggtggtgattgaaggtggtggactaatgttcaagatagctgctggcaagc<br>caaacctatggctcctcttggccgaagcacctcctcaacctctgcaagctggtatcctGAGACC<br>(Uppercase, Bsal sites)                                                                                                                                                                                                                                                                                                                                                                                                                                                                                                                                                                                                                                                                                                                                                                                                                                                                                                                                                                                         | This study |
| pYTK001-Tim50          | GGTCTCatatgctgtccatttaagaaattcggtagactaaattcaagggtccttagggtgtgcatctgccccaacac<br>ctaacatcgttcaagcatccagaagactttaaacaagttattcaagttttacaaaaaagaaacaaagacgacagccta<br>aatccattctacagatgatgctgttcaaggccggtgtgacgtcgtgagaaggccaaggcaaaaacgaggaacat<br>caggagaaggagagaggacaagaatgaaccttctcaaaaagtgaaaaatctagaagaaaaagacaaactctacag<br>atataaaagagaaaagtatgtaactggtttatcatttttctgctgctgacaggtactgcaatctacatggcaagggt<br>gggagcctcaagagctgaagaattgaagaagacatcgataatggtactactttatcattatgtataaaagattcaaggc<br>caggttcaactcaatgttccactactccaagacccttccctgatttactcctccaccaccaccaccaccaccacaaag<br>gccattaaactctgtatcactggaagatttttgggtcattctgagtggtcacaagcatggttggagaacggccaaaaga<br>cctggtgctgactactctgggttacctatcgactattacgaaattgtttgtttatccaactatagtgactctgacaaaatc<br>gctgaaaaattagatcaatccatcattcgtatctataattgttcaaggaactggtttacaaagacggtgtgcacattaa<br>ggatctgcaaaattgaatagagatttgatgaagtaaatcattattgacactgacctaacagttacaaattgcaacctgaaaa<br>tgctattccaatggagccatggaatggtgaagctgatgacaaattagattgattcattttggagtagccttgcctcaac<br>aaaccaaggatgtagaccaatctgaacagctttgaagacaagaagaacctagcagaagaattgatcatcgtgtgaaaa<br>aattgaaggataaattttacggagatcataatctggtggcaactgggcaatgacggcactaggttaggaaattccctggg<br>cggcagcaccaggtcccgtcgtgattgattcatgaagaaggcaaaaagaactatattgattatgaagatgattgaggaa<br>gaaaaggaaaaaaattagaatacagcagggagcaaatggcggggcaaacattacgtgaaaagactgttgaagtaact<br>tgccttccgagaagaacaaatgaaaatacaattggagaagcagaaggaggtgagccttattgaaagagaaaagaa<br>aaagaagaagattgctgaatccaaaggatcctGAGACC<br>(Uppercase, Bsal sites) | This study |
| pYTK001-Tim44          | GGTCTCatatgcacagatccacttttaccagacgtccggcagcagctcaggacactaacgcaaggtacagatcgc<br>agtacacaggattactcgttcccagattatttccacctctacgacctgctgcaaggtggaacccctcgatcaccactc<br>cagattttccgcatatcacaagaaggaatgggagaagctcaggaaactacaggagaacataaaagacgctgcaagatg<br>cttccgggaaagttagcagctgaggtcctacaaaaggctaggaagcatattgaaagctcagagaggtccacaatt<br>gtgggtaaaaacttgaaaaagaccggtgaaacctggaacatatagccaactaaggcctgggagtcgaactcggtaaga<br>acacaagaagagcgctgcccacgcgcaagaagctggatgagagttttgagccagtgagacagacagcagcagattaca<br>aggaagctcagaagctgacgatggggagagttcccagatacgggtgggtttatcacgaaagagcaaggagactaaa<br>cgtgagagagatctggccttgggaaaagacacagggcagtaaaagagcaatgaagatgcaggaacagcagtggttgcg<br>acaaatcagagctaaagaatcgttggtaagaaagggtgaggtttcaaggagaaaaccggtgttggcgtctatacaatc<br>tttaagaacaaattgtgggatgaaagtgaacccttaattgttcatgaggaataaaccacaaagtggcggtttctt<br>tgcaagaacagaatcctccgttttacagtaatttaagctaattggaccacaccttttgaacgaaagcttaccagacact<br>aagagaatacattgtcccagattctgaagcgtatgaaaggcagatgcaaaagtctcaaaaaattggtcagcgaggcg<br>cattcaatgtttacgcccacagaaaatctcaaaagacaggatgtttacgccgatggcgtatctagatcagggg<br>cgttgaatagtgagtgcaaaagttattgctcccgaagacatccagcttgggtgctgggtgtagagcacaagaaatcaac<br>ctttacaggaaaaaaactggcgagattgctggctggtgacgaaagctaatcttgatgagctctatgcatggtttcacc<br>agagatccagagcaaatcagcagatgacgaacagaagggtggaagatcttgagtttggcgcgggggttctagacaatt<br>caccggatcctGAGACC<br>(Uppercase, Bsal sites)                                                                                                                        | This study |
| pYTK001-Tim44<br>(-GS) | GGTCTCatatgcacagatccacttttaccagacgtccggcagcagctcaggacactaacgcaaggtacagatcgc<br>agtacacaggattactcgttcccagattatttccacctctacgacctgctgcaaggtggaacccctcgatcaccactc<br>cagattttccgcatatcacaagaaggaatgggagaagctcaggaaactacaggagaacataaaagacgctgcaagatg<br>cttccgggaaagttagcagctgaggtcctacaaaaggctaggaagcatattgaaagctcagagaggtccacaatt<br>gtgggtaaaaacttgaaaaagaccggtgaaacctggaacatatagccaactaaggcctgggagtcgaactcggtaaga<br>acacaagaagagcgctgcccacgcgcaagaagctggatgagagttttgagccagtgagacagacagcagcagattaca<br>aggaagctcagaagctgacgatggggagagttcccagatacgggtgggtttatcacgaaagagcaaggagactaaa<br>cgtgagagagatctggccttgggaaaagacacagggcagtaaaagagcaatgaagatgcaggaacagcagtggttgcg<br>acaaatcagagctaaagaatcgttggtaagaaagggtgaggtttcaaggagaaaaccggtgttggcgtctatacaatc<br>tttaagaacaaattgtgggatgaaagtgaacccttaattgttcatgaggaataaaccacaaagtggcggtttctt<br>tgcaagaacagaatcctccgttttacagtaatttaagctaattggaccacaccttttgaacgaaagcttaccagacact<br>aagagaatacattgtcccagattctgaagcgtatgaaaggcagatgcaaaagtctcaaaaaattggtcagcgaggcg<br>cattcaatgtttacgcccacagaaaatctcaaaagacaggatgtttacgccgatggcgtatctagatcagggg<br>cgttgaatagtgagtgcaaaagttattgctcccgaagacatccagcttgggtgctgggtgtagagcacaagaaatcaac<br>ctttacaggaaaaaaactggcgagattgctggctggtgacgaaagctaatcttgatgagctctatgcatggtttcacc<br>agagatccagagcaaatcagcagatgacgaacagaagggtggaagatcttgagtttggcgcgggggttctagacaatt<br>caccggatcctGAGACC<br>(Uppercase, Bsal sites)                                                                                                                        | This study |

|                                  |                                                                                                                                                                                                                                                                                                                                                                                                                                                                                                                                                                                                                                                                                                                                                                                                                                                                                               |            |
|----------------------------------|-----------------------------------------------------------------------------------------------------------------------------------------------------------------------------------------------------------------------------------------------------------------------------------------------------------------------------------------------------------------------------------------------------------------------------------------------------------------------------------------------------------------------------------------------------------------------------------------------------------------------------------------------------------------------------------------------------------------------------------------------------------------------------------------------------------------------------------------------------------------------------------------------|------------|
|                                  | <p>aggaagtctcagaagtcattgacgatggggagagttcccatacgggtgggtttatcacgaaagagcaaaggagactaa<br/> cgtgagagagatctggcctctgggaaagacacagggcagtaaaagagcaatgaagatgcaggaacagcagtggtgcg<br/> acaaatcagtgctaaagaatcgttggtaagaaagtgaggattcaaggagaaaaccgtggtgcccgttctatacaatc<br/> ttaagaacaatgtgggtgaaagtgaaaacccttaattgtgtcatgaggaaaataaccaacaaagtggtgggttctt<br/> tgcaaaacagaatctcccgtgtttacagcaatthaagctaattggacccaaccttttgaacgaaagcttcaccagacact<br/> aagagaatacattgtcccagattctgaagcgtatgaaaggcagatgcaaaagttcctcaaaaaatggtcagcgaggcg<br/> ccattcaatgtttacgcccgaacagaaaatctcaagaacagagatgttacccgatggccgtatcctagatcagggg<br/> cgttgaatagtgagtgcaagttattggctcccgaacatcccagcttgggtggtgggtgtagagcacaagaaatcaac<br/> ctttacagaaaaagaaaactggcgagattggcgtggtgacgaagctaatacttgatgagcttctatgcatggtttacc<br/> agagatccagagcaaatcgacgatgacgaacagaagggtggaagatctggagttgtgcccgggggttctagacaatt<br/> cacctaaggatcctGAGACC</p> |            |
| pYTK001-Tim21                    | <p>GGTCTCatatgagctcaagttgcttagcttcttaccgtttaggacatagaagcccttggttccacgatataactttcgt<br/> gaactcatcggaataactcatacgtcactgcttagaacaagattatagtaatggcaccggcgcaacatcaggaagaa<br/> ggatgacaagactaggaataaacctaaagccattatggcctcaagtaaaatccgcttctacgttcccttttggcatactgtg<br/> ataggagctgtgtatctgctattgtttacctaattcttcagaacttttccgctcaggtgatacagcagctttcaacaga<br/> gcagtttctatgtagagaaaaacaagataaagaagttgttacagtgccagcagtgccattacgggaaaaagaaagattg<br/> aaagcgtacggtgagcttataacgaatgacaaatggacaagaaacaggcctatagtatctccaaaaaattagataaaga<br/> aggtaggacacatcactatagattccacgttgatccaaaaagaaaatagcgttgggtcacttagaggctaaagaatcc<br/> aaacagaattatcaacctgacttatacaatgtacgttgatgtcccggagagaagcgttactattgatcaagccaaaattgc<br/> atccggttctaattcgaagggttcttgggaattagatggggcccagaaaagatggatcctGAGACC<br/> (Uppercase, <i>Bsal</i> sites)</p>                                                                       | This study |
| pYTK001-Pam16                    | <p>GGTCTCatatggctcacagggttctacaggttataatcacaggaactcaagttttgaaaagcattcggcaggcgt<br/> atagacaagcggctcacaatcagtgaaacaaggtgctcaaatgcatcaagaaggggaacaggaagggcgaatg<br/> gtgtattacgttgatgagagttgtaaaatttaaatattgaagaatccaagggcgattaaacatggacaagattaataaca<br/> ggtttaactatctattgaggttaacgataaaagaaaaggtggaagcttacttactacagagcaaaagttatcgagcagcaga<br/> aggttaaaatgggaactggctcagagagaaaaaatgcaagggcgaagcaggggacgcttcaacagcgaaacctcc<br/> tccgaattcaacaaatcctggtgcagataatgtgcaagcagcaatcaggatcctGAGACC<br/> (Uppercase, <i>Bsal</i> sites)</p>                                                                                                                                                                                                                                                                                                                                                        | This study |
| pYTK001-Pam17                    | <p>GGTCTCatatggtaccagtgccattagattgtcctcgaagactgttcgtagtcaacctctgtcaccgctgcccattg<br/> cgctcagctgctacaacctacccttaagatcatattctcagcccgcacccctcaagactccagatctgtacatggtctgatttt<br/> tcaaattgaggaacagcagcgtagaatcaatgttggctctcgtgttactgctcttttgggtgtaacglttcatgggttaacct<br/> tccacaatggaatagaccgactcaaatgctattcggattcgaccattaactgtaattcagctgggataatagcctctggt<br/> gcaactaggctactgttgggtccgatagttggttcgcaagtttcaaaacttcccataaccaacaattggcacagttcaacaaca<br/> aaaataaagagtttctaaaacataatcacaataacagggctgatcctctctcaaaagttcagtaactcgttccagattatc<br/> gggaaaagataggttccctaaaggaatataagcaatggtaagagattgtcacgcttacgaaagaaagccaaagaatttt<br/> tgggatcctGAGACC<br/> (Uppercase, <i>Bsal</i> sites)</p>                                                                                                                                                                                                  | This study |
| pYTK001-Pam18                    | <p>GGTCTCatatgagttctcaagtaataactgtaattctattgaggaccacaactaccattcctggtcaactaattggtct<br/> gcgaacgttactgtgatggagctgggttaatgtcggatccagaatggttcgaggggtcaaaagaccggaatggaccttat<br/> tttgatcaagcttgaactacatgggagaacatcctgtgataacaggttttgggccccttttaactttatatttacagccggtgat<br/> ataaatcaatcgaagggacttaacggtggaatacactactgcttctgaaaggcggattgacccgaaaatgaattc<br/> aaagagcctcagatgttgaattgacagaaaaatcactgactaaaaaaagttgaaagaggttcataggaaaaattatgtt<br/> agctaatcctgacaaggtggttctcattttggccactaagataaacgaagcctaaggacttttggaaaaaggggtat<br/> tagcaaggatcctGAGACC<br/> (Uppercase, <i>Bsal</i> sites)</p>                                                                                                                                                                                                                                                                                                 | This study |
| pYTK001-Mgr2                     | <p>GGTCTCatatgcctcctctccacaaaattatgacgaacagcagcctcgaattggacaaaattcaaatggggtgatga<br/> tgggtactaccgctggtgtctgcacaggtcctcatttgggtgattgccaatcgaactcaaggccaggtcctgatggtgatgt<br/> agaacactagggaaatcattgctggtcagcgggtaccttgggtatttatgtccatcgggtctataatcagaagtgatagtg<br/> aaagtagtcaatgtccatcctaactgaacctacagcaacaggaagactggaatgtggaagctctgccaatcag<br/> gtatacgtgaaggacgatcctGAGACC<br/> (Uppercase, <i>Bsal</i> sites)</p>                                                                                                                                                                                                                                                                                                                                                                                                                                                                       | This study |
| pYTK001-Strep-Mgr2- <i>tMGR2</i> | <p>GGTCTCatatggtggcccaccctcagtcgaaaagcctccttccacaaaattatgcaacagcagcctcgaattggg<br/> acaaattcaaatggggtgatgaggttactaccgctggtgctgcacagggcactcatttgggtgattgccaatcgaactca<br/> aggcccaggtcctgatggtgatgttagaacactagggaaatacattgctggtcagcgggtaccttgggtatttatgtccatc<br/> gggtctataatcagaagtgatgaaagtagtccaatgtccatcctaactgaacctacagcaacaggaagactggaa<br/> atggtgaagcctctgccaatacgtgatacgaagactgaggggaaatgtgcatatattacgttccccatggttcttaa<br/> acattgttactatctgctatttttaagataatctatctacgtttataactctcaatacctatgatttaagttcatcagcagag<br/> gcttatttactaataatattgtatcgtgggaaatgctataatgtataccggttgcacttatttgggtggggtcactaacggcaa<br/> gactcataaaaagagttatcgaactcgttatattgtaactttgagaaggaatgggaacccaaagcatataatag<br/> acaatgctgtGAGACC</p>                                                                                                                                                                 | This study |

|                                                                            |                                                                                                                                                                                                                                                                                                                                                                                                                                                                                                                                                                                                                                                                                                                                                                                                                                                                                                                                                                                                                                                                                                                                                                                                                                                                             |                          |
|----------------------------------------------------------------------------|-----------------------------------------------------------------------------------------------------------------------------------------------------------------------------------------------------------------------------------------------------------------------------------------------------------------------------------------------------------------------------------------------------------------------------------------------------------------------------------------------------------------------------------------------------------------------------------------------------------------------------------------------------------------------------------------------------------------------------------------------------------------------------------------------------------------------------------------------------------------------------------------------------------------------------------------------------------------------------------------------------------------------------------------------------------------------------------------------------------------------------------------------------------------------------------------------------------------------------------------------------------------------------|--------------------------|
|                                                                            | (Uppercase, <i>Bsa</i> I sites)                                                                                                                                                                                                                                                                                                                                                                                                                                                                                                                                                                                                                                                                                                                                                                                                                                                                                                                                                                                                                                                                                                                                                                                                                                             |                          |
| pSS122<br>( <i>P<sub>TIM17</sub></i> -Tim17-Spot)                          | GAATTCctccagcattataaagcatalctcaacaataaccattcgggttatactgaatagcccacgcacgggttcgggggtgt aacgattatgcatcctcacaacatgccactgtcagtgccacgggaagtagcgggactttatcaaatcattatctgtg cataaagtgatagatattcatatagatgtatataatcattgaatacagaatctcgggtgtatacaacgaacattcatcgg acgccttttactgtcattgtcaacaagtggtgtaaccggcattcttgcgcaaaagtttccattttatgccaatccagaggt aaaaagcactattctcatcaaaaagatggaaaagctgtgaaagagtcagagtcagaagaaagcgttaagaaaaatagagta cacgggagcgttatgtcagccgatcattcgagagatccatgctctatagcactaaatgatttcgggtggttccatggg tgccattgggtgtgttggcatgggattaaaggtttgaaattcgcattaggtagcgtggttcaggagctatgagcgcca ttaaagcgcgtctcccgtactgggtgtaattttgggtgtgggggtgttttttctgactttgattgcgctgtgaagccgttaga aagagagagggccatggaatgctatcattgcaaggggttttctggtggccttagctgtaagaggtggtggagggcatac aaggaaacagttcgtacacgtgtcctgtttgtgggtgtgattgaaggtgtgggactaatgtttcaagatgctgctggcaag ccaaacctatgctcctcctttcccgaagcactctcctcaacctctgcaagctactagctctgatagagttgagcagctc acattggtcttgggtggaggttctggcgtgttcaactcagatagatagctgctgttctcactggagttcttagcagctag acattatagaccatttttctcgtttgttggaaagacccttattcggcattgtttttgtacataaatgacgtatcgactagcctct tcatctctgaagagaaaatatacaacaagccaaaagctagtcagaaactGGATCCgcaCTGCAG<br>(Uppercase, <i>Eco</i> RI, <i>Bam</i> HI, <i>Pst</i> I sites; bold/underlined, start and stop codons) | This study               |
| pSS239<br>( <i>P<sub>MGR2</sub></i> -Mgr2- <i>T<sub>MGR2</sub></i> )       | GAATTCgattcacaatgtctacctgtagattgctgttcaatcggaaactggaattcttcttaacattatgagccaaccac tttttatttctttcaaaactcccgaacaagccaacattaccaaacagactccactactttccataagaaggaagcacagaa caccacacaagatcatatagcacaatagcgaacagctcaagccaatattaagataatgctcctcctccacaacatt atgcgcaacagcagcctcgaattgggacaattcaaatggggtgatgaggtactaccgtggtgtcgcacagggcat cctattgttggtgattgccatcgcaactcaaggcccaggtcctgatggtgtagttgaacactagggaaatacattgctggttca ggggtacctttgggtattatgtccatcgggtctataatcagaagtgatgaaagtagtccaatgtcccactcaactga acctacagcaacagggcaagactggaaatgtggaagctcgtgcaaaatcgggtatagcaaggaactgagggggaaattt gcatatattacgcttcccactcgttttcaaacattgttacttctgctattttttaaagatctatctactcgtttataactctca ataccatgtattaaagtcatcacgacgaggcttattactaataatattgtatagctgggaaatgtcaatagtataccggttgc atctattttgggtggggtcactaacggcaagactcataaaataaagtattcgaactcgttattttgaaactttgagaa aggaaatgggaaccaaaagcatataatagacaatGGATCCgcaCTGCAG<br>(Uppercase, <i>Eco</i> RI, <i>Bam</i> HI, <i>Pst</i> I sites; bold/underlined, start and stop codons)                                                                                                                                                                                                                                                                           | This study               |
| pSS254<br>( <i>P<sub>MGR2</sub></i> -Strep-Mgr2- <i>T<sub>MGR2</sub></i> ) | GAATTCgattcacaatgtctacctgtagattgctgttcaatcggaaactggaattcttcttaacattatgagccaaccac tttttatttctttcaaaactcccgaacaagccaacattaccaaacagactccactactttccataagaaggaagcacagaa caccacacaagatcatatagcacaatagcgaacagctcaagccaatattaagataatgctcctcctccacaacatt gaaaagcctcctcctccacaacattatgcgcaacagcagcctcgaattgggacaacattcaaatggggtgtagtgaggta ctaccgtcgggtgtcgcacagcctcctattgggtgattgctcgcactcaagcccaggctcctgatggtgtagttagaac actagggaaatacattgctggtcagcgggtacctttgggtattatgtccatcgggtctataatcagaagtgatgaaagt agtccaatgtcccactcaactgaacctacagcaacaggaagactggaatgtggaagctcgtgcaaaatcgggtata cgtgaaggaactgagggggaaattttgcatatattacgctcccactcgttttctaaacattgtactatctgctattttttaaagat atctatcactcgtttataactcctcaataaccatgtattaaagttcatcacgacgagcctatttactaataatattgtatagctggga aatgtctaataatgataccggttgcattttttgggtggggtcactaacggcaagactcataaaataaagtattcgaagca ctctgttattttgaaactttgagaaaggaatgggaaccaaaagcatataatagacaatGGATCCgcaCTGCAG<br>(Uppercase, <i>Eco</i> RI, <i>Bam</i> HI, <i>Pst</i> I sites; bold/underlined, start and stop codons)                                                                                                                                                                                                                                           | This study               |
| pSS070<br>(pETDuet-1 6xHis-3C-Tim44CTD)                                    | GGATCCgctggaagtgtctgttcaggcggccgacaaatcgaagcctaaagaatcgtttgtaagaagtgaggatttca aggagaaaaacgggtgtggtgcttatacaactcttaaaagaacaaatgtgggatgaaagtgaaaaccccttaattgtgtca tgaggaaaaataaccaacaaagtggtggttcttgcagaacagaatcctccggtttacagtcatttaagctaatggac ccaacctttcgaacgaagctcaccagacactaaagagaatacattgtcccgagattctgaaagcgtatgaaagggc atgtcaaaagtctcaaaaaatggtcagcagggcgcattcaatgttacgcccacaagaaaatctcaagaaacaggg atgtttacccgatgcccgtatcctagatcagggcgtgaaatagtagtgcaaaagtattggctcccgaagacatccca gtctgtggtgctgggtgtagagcacaagaatcaacctttacaggaaaagaaaactggcgagattcgggctggtgacga agctaataatctgatgagctctatgcatgttttaccagagatccagaaatcgacgatgacgaaacagaaggggtg aagacttggagttgtgctgggggttctagacaattcactaaCTGCAG<br>(Uppercase, <i>Bam</i> HI and <i>Xho</i> I sites; bold/underlined, stop codon)                                                                                                                                                                                                                                                                                                                                                                                                                                                                                           | This study               |
| pYC17a<br>(pYTK-e115 <i>TIM17</i> -HA)                                     | GAATTCctccagcattataaagcatalctcaacaataaccattcgggttatactgaatagcccacgcacgggttcgggggtgt aacgattatgcatcctcacaacatgccactgtcagtgccacgggaagtagcgggactttatcaaatcattatctgtg cataaagtgatagatattcatatagatgtatataatcattgaatacagaatctcgggtgtatacaacgaacattcatcgg acgccttttactgtcattgtcaacaagtggtgtaaccggcattcttgcgcaaaagttccattttatgccaatccagaggt aaaaagcactattctcatcaaaaagatggaaaagctgtgaaagagtcagagtcagaagaaagcgttaagaaaaatagagta cacgggagcgttatgtcagccgatcattcgagagatccatgctctatagcactaaatgatttcgggtggttccatggg tgccattgggtgtgttggcatgggattaaaggtttgaaattcgcattaggtagcgtggttcaggagctatgagcgcca ttaaagcgcgtctcccgtactgggtgtaattttgtgtgtgggtgttttttctgactttgattgcgctgtgaagggcgttaga aagagagagggaccatggaatgctatcattgcaaggttttctgctggtggccttagctgtaagaggtggttggaggcatac                                                                                                                                                                                                                                                                                                                                                                                                                                                                                                                    | Fig. 2f, ED<br>Fig. 6a-c |



|                                                                |                                                                                                                                                                                                                                                                                                                                                                                                                                                                                                                                                                                                                                                                                                                                                                                                                                                                                                                                                                                                                                                                                                                                                                                                                                                                                                                                                                                                                                                                                                                                                                                                                                                                                                                                                                                                                                                                                                                                               |                                   |
|----------------------------------------------------------------|-----------------------------------------------------------------------------------------------------------------------------------------------------------------------------------------------------------------------------------------------------------------------------------------------------------------------------------------------------------------------------------------------------------------------------------------------------------------------------------------------------------------------------------------------------------------------------------------------------------------------------------------------------------------------------------------------------------------------------------------------------------------------------------------------------------------------------------------------------------------------------------------------------------------------------------------------------------------------------------------------------------------------------------------------------------------------------------------------------------------------------------------------------------------------------------------------------------------------------------------------------------------------------------------------------------------------------------------------------------------------------------------------------------------------------------------------------------------------------------------------------------------------------------------------------------------------------------------------------------------------------------------------------------------------------------------------------------------------------------------------------------------------------------------------------------------------------------------------------------------------------------------------------------------------------------------------|-----------------------------------|
|                                                                | <p>aaggaacagttcgatcacgtgctgtgtgtgggtggtgattgaaggtgggactaatgtttcaagatatgctgctggcaag<br/> ccaaacatgctcctcttcccgaagcaccttctcaacctctgcaagctactgattatccctatgacgtcccggactat<br/> gcaggatcctatccatgatgcttccagattacgct<b>tagg</b>catgtagacattatagccatttttcatcggttggaaagacc<br/> cttattcggcatgtttttgtacataaatgacgtatgcactagcctcttactgttttacttttcaagattacca<br/> accatttctcaacctgtacatattatattgaaaaagtaccatactcatctgtagagaaaaatcaacaagccaaaa<br/> gctagtcagaaactGATCCgcaCTGCAG<br/> (Uppercase, <i>EcoRI</i>, <i>BamHI</i> and <i>PstI</i> sites; bold/underlined, start and stop codons of<br/> Tim17-HA)</p>                                                                                                                                                                                                                                                                                                                                                                                                                                                                                                                                                                                                                                                                                                                                                                                                                                                                                                                                                                                                                                                                                                                                                                                                                                                                                                                                          |                                   |
| <p>pYC17b<br/> (pYTK-e122 P<sub>DD12'</sub><br/> TIM17-HA)</p> | <p>GAATTCcagcccacatactacttttcttctgtttttttttatatttcaagggttaaacctgcttagactatgtctataataaa<br/> aaaaaaatagctctattccgtttcttttattctattgatattccatcacactttcatcttaatcacggatgatactgataatagggtg<br/> actgctgctgacggttacagtgccctctcaattggaaaatccaagcttcaagatgggtaactgtattcaaaagatcctc<br/> aagataaaacacagatcgacagatccgagagtggtctgtgcttgggtcaaaatcttcccacctcatgcaaatgattt<br/> tctgactccaaaaaagacagagccctcgatagttcccgaatgtgtaacatcaaagccaaagcactccttataagaatg<br/> catgaacgttgatactagcagctgggaaactacagggctaaactaactagatccatattttgagagcattgaaagat<br/> accggagtacaagctgggtagaaggatttttacttaacagcaatgaaaatcaacttctagactgaatccctcaagaaaat<br/> gcaaaagactaaactgatactggttttaaaagagaaaagatgcaaatatgctggagttataccatcaaaacaacttggacggc<br/> ccgaacaaatgtccgcaaaaaagatcttataaagtgcagtgacactatcatttataatacaaaaactccaccgcaca<br/> atagttgtcggaagtcataatcaatctgtacgagcttcaaaataacttttaggatcggtcccctataaaaatataata<br/> atgggttagttcctctctctgtaaacatgaagttgcttctgactgtttttgcttctcttcaaaagaatcaatcggtacc<b>atgt</b><br/> cagccgatcattcgagagatccatgtcctatagctactaaatgattcgggtgcttggccatgggtgccattggtggtgt<br/> ttggcatgggataaaggttttagaaatccattagggtgagcgtggtcaggagctatgagcgcataaagcggctgctc<br/> cgtactgggtgtaattttggtgtggtggtttatttgcactttgattgctgctgtagagccgttagaaagagagagacc<br/> atggaatgctatcattcaggggtttcactggtggtgcttactgtaagaggtggtggaggcatacaagaaacagttcgatc<br/> actgtgctgtttgtgggtggtgattgaaggtggtgggactaatgttcaagatagctgcttggcaagccaaactatggctcct<br/> ccttggccgaagcacctcctcaacctctgcaagctactgattccctatgacgtcccggactatgagatcctatccata<br/> tgacgttccagattacgct<b>tagg</b>catgtagacattatagaccatttttcatcggttggaaagtaccctattcggcatgtttt<br/> tacataaatgacgtatgcactagcctccttactgttttacttttacttttcaagattaccaaccatttctcaacat<br/> gtacatattatattgaaaaagtaccatactcatctgtagagaaaaatcaacaagccaaaagctagtcagaaactG<br/> GATCCgcaCTGCAG<br/> (Uppercase, <i>EcoRI</i>, <i>BamHI</i> and <i>PstI</i> sites; bold/underlined: start and stop codons of<br/> Tim17-HA)</p> | <p>ED Fig. 6d-g</p>               |
| <p>pYC23<br/> (pYTK-e115<br/> TIM23-HA)</p>                    | <p>GAATTCattgaaaaaagagaaaactgaaaaaagacaccgcacaaaaaagagagaaagaaaccttta<br/> cgtagagcaaaagggaaacatttgtgctttaaataagaaataataggttattgcaatccctccattgcagaaaaaaa<br/> aaaaaaagaccatttctcttactctcttgcctgtacatactacaggttatagcgttaacaaaagcagatagaaaaaa<br/> aaaaataaccaagataatataaggtatactgttaacagatcacacacaatc<b>atgt</b>ctggttgggataagacacctac<br/> cgatgatgcaatgctcgggtgggccaagatacaaccaagcctaaggaactatcgtgaagcagatgattggttcca<br/> gcaaaacatacaataataatcaggtcctggtggaatgcatgctgacaccgctaggtgatccttggctggtatgaca<br/> aggggtgagatattgatctggaagaagaacaactatcctgtagaaggtcacagggtgatccctcccggtgggtg<br/> accgatgacctatgtaccggtaccggtcctgctggtgactggtatcggagggtttctggtatgatcagggtctg<br/> agaatattccgccaatagtcgggaaaaatgcaattgaacaccgctcgaatcacactaagagaggtccctcttaggta<br/> ataatcggggattcgcggtgagctacaataatcaattcaataatagatgactaagaggcaaacatgacaccgctgg<br/> ctcattggcgtggtggccctcagggcgttcttcaagcttcaaaaggttgaacccatgggtattcctcctcctcctc<br/> gcccgtcgtgcccgtggtgtagtcaagaaaagactactgaaaaaactgattatccctatgacgtcccggactatg<br/> aggatcctatccatagacgttccagattacgct<b>tagg</b>caacacaagaactactctctctctctctctctctctctc<br/> gctttccccatgactgatgctgctgtatagcatttgaataatagtagcgaagaaacaaacaaatgaaag<br/> tagaaacccggagaaaagatcaaaaaacaaaaaaaagatggaaagagcgcagatgtgtagatgtacatata<br/> tacaactactgtatttcttctgactgtaagctattgtttcogatggcGATCCgcaCTGCAG<br/> (Uppercase, <i>EcoRI</i>, <i>BamHI</i> and <i>PstI</i> sites; bold/underlined: start and stop codons of<br/> Tim23-HA)</p>                                                                                                                                                                                                                                                                                                                                                                                                                                                                          | <p>ED Fig. 6m</p>                 |
| <p>pYC002<br/> (pET32a-Cyb2Δ-<br/> DHFR)</p>                   | <p>CAT<b>ATG</b>ctgaaatacaaaccttactgaaaatctcgaagaactctgaggctgctatcctgctgctgctgctgctg<br/> aacacaatccgctgacgttctactccttccaaaatccaagctgctgcaacaagactcaagttccgctgctgactg<br/> gcataatggcacaatcgacaacgagccgaaactggatgataaaacaaaagatttcccgcctgaggtgccaagcata<br/> acaagcccgatgattcgtggtgtgatcaatggttactgatacactaacgcttctcctgcaaatcatcagggtggcagg<br/> atgtatcaagttaacgccgggaaagatgactgctattttgaaccactgacgctcctaattgcatcgataagatattgctc<br/> ccgaaaaaaatgggtcccctgcaagatccggcgtaccgttctgctcattgaaactgcatgctgctgctcccaaaat<br/> ggggattggcaagaacggtgacctccctggcctccgctccgcaacgagttcaagtaactccaactgatgaccacaacctt<br/> cagtggaaggtaaacagaatcgtggtgattatgggtcgcaaacctggttctcattcctgagaagaatcgtcctttaaaggac<br/> cgtattaatattgtcagctgtaactcaagaaccaccacggtgagctcatttctgcaaaaagtttggatgatgcttactg<br/> cttattgaaacaaccggaaattggcaagtagacatggttggattgctggagggcagttctgtttaccaggaagccatgaa<br/> caaccaggccacctccctcttgtgacacgatcatgaggaattgaaagtacacgttttccagaaattgattgggg</p>                                                                                                                                                                                                                                                                                                                                                                                                                                                                                                                                                                                                                                                                                                                                                                                                                                                                                                                                                                              | <p>Fig. 2h, ED<br/> Fig. 6i-k</p> |

|                                                                     |                                                                                                                                                                                                                                                                                                                                                                                                                                                                                                                                                                                                                                                                                                                                                                                                                                                                                                                                                                                                                                                                                                                                                                                                                                                                                                                                                                                                                                                                                                                                                                                                                                                                                       |                                                      |
|---------------------------------------------------------------------|---------------------------------------------------------------------------------------------------------------------------------------------------------------------------------------------------------------------------------------------------------------------------------------------------------------------------------------------------------------------------------------------------------------------------------------------------------------------------------------------------------------------------------------------------------------------------------------------------------------------------------------------------------------------------------------------------------------------------------------------------------------------------------------------------------------------------------------------------------------------------------------------------------------------------------------------------------------------------------------------------------------------------------------------------------------------------------------------------------------------------------------------------------------------------------------------------------------------------------------------------------------------------------------------------------------------------------------------------------------------------------------------------------------------------------------------------------------------------------------------------------------------------------------------------------------------------------------------------------------------------------------------------------------------------------------|------------------------------------------------------|
|                                                                     | <p>aaatataaactctcccagaataaccaggcgctctctgagggtccaggaggaaaaagggatcaagtataagttgaggtc<br/> acgagaagaaagacCTCGAGcaccaccaccaccactga<br/> (Uppercase, <i>NdeI</i> and <i>XhoI</i> sites; bold/underlined: start and stop codons)</p>                                                                                                                                                                                                                                                                                                                                                                                                                                                                                                                                                                                                                                                                                                                                                                                                                                                                                                                                                                                                                                                                                                                                                                                                                                                                                                                                                                                                                                                         |                                                      |
| <p>pYC008<br/> (pYTK-e123<br/> <i>pTIM23-Tim23-Spot</i>)</p>        | <p>GAATTCattgaaaaaaagagaaaataactgaaaaaaaagacaccgcacaaaaaaagagagaaggaaccttta<br/> cgtagagcaaaagggaaacattgttgctttaataatagaataataggttattgcattccctcattgcagaaaaaaa<br/> aaaaaaagaccattttctctactctcttgctgtacatactacacgttatagcgttaacaaaagcagatagaaaaaa<br/> aaaaataaccaagataataggtatactgtttaacagatcacacacaatc<b>atg</b>tcggtggttttggagataagacacctac<br/> cgatgatgcgaatgctgcccgtggcgcccaagatacaaccaagcctaaggaaactatcgttgaagcagagtttaggttcga<br/> gccaaacatcaataacataatcaggtcctgggaaatgcatgctgcacaccgctaggctgcattcttggctgcttagaca<br/> aggggtgtggagtattagatctggaagaagaacaactatcctctgtagaaggctcacagggctgatccctcccggtggg<br/> accgatgacctatgttacgtaccggtgccgtctactgctggagcttggtatcgagggttttctggtatgatcagggctgc<br/> aaaatattcccgaatagctccgaaaattgcaattgaacaccgctcgaactcattactaagagaggtccctcttaggta<br/> ataatcggggattctcgttgagctacaatcatcaattctacaatagatgactaagaggcaaacatgacaccgctggg<br/> ctcattggcgtgggccccacgggctttgttcaagcttcaaaaggttgaaacccatgggtattcctcggcaatggtg<br/> gcccgtgctgcccgtctggtgtgtcaagaaagactctgaaaaactgctgtagagttagagcagctcac<br/> attgtctctggtggaggttctgcccgtggtcaactccagatagatgacgtgctgttctactggagttct<b>agg</b>caacacaa<br/> gaacctactctctctctctctctctctcctctcgttccccatgactggtgctgtatagcattgaaaaata<br/> atagtagtaacgcagaaacaaccaatgaaagtagaaacccggagaaaagatctaaaaaacaaaaaaaaga<br/> tgaaagagcgcagatgtagatgtacatatatacaactactgtatgtattgctttgtactgtaagctattgtttcga<br/> ggcgatcccgaCTGCAG<br/> (Uppercase, <i>EcoRI</i> and <i>PstI</i> sites; bold/underlined: start and stop codons of Tim23-Spot)</p>                                                                                                                                                                   | <p>Fig. 3d, ED<br/> Fig. 9a,b</p>                    |
| <p>pYC005<br/> (pYTK-e112<br/> <i>pGAL1-Grx5-S80-sfGFP</i>)</p>     | <p><b>ATG</b>TTTCTCCAAAATTCATCCCATAGGTCAATTTCCCCCATCCTCCGGGCTAAGA<br/> CTCTTCTCGTTACCAAAATCGGATGTATTTGACACAGAGATAAGAAAAGCTATTGA<br/> AGATGCCATCGAATCGGCTCCAGTGCTTTTCATGAAAGGTAECTCCTGAATTTCC<br/> CAAGTGTGGATTTCAAGAGCAACCATTGGATTATTAGAAAATCAAGGCCTTGACCC<br/> GGCCAAATTTGCGGCTTATAATGTTtagaagacccagagctacgtgaaggtatcaagagtttcagaat<br/> ggccaactattccacagtatatgaaacaagaattcattgggtggtgattacaaagtatggcagctctgtgaattg<br/> gcccattgctagaagagcacaggcattggtaccctggcgatcagagggtcttcaggtattacggttaccgtccaaa<br/> atccaagctgttcaacaagactcaagttccggtgatctgaaactggcataatggccaaatgcacaacgagccgaaact<br/> ggatagtaaaacaaagattcgcccgtgaagttgccaagcataacaagcccgatgattcgtgggtgtgatcaatggtt<br/> acgtatacagcttggatccggcggtaccTCCAAGGGAGAGGAGTTGTTCACTGGAGTTGTACTT<br/> ATCTGGTCGAGTTAGACGGGACGCTCAACGGACACAAGTTTAGTGTAAGAGGTGA<br/> GGGAGAGGGTGACGCTACCAATGGAAAGTTAACTTTAAAGTTCATATCCACTACTGG<br/> CAAGTTACCTGTCCCTTGGCCTACTTTAGTGACTACTTTGACATACGGAGTACAAATG<br/> TTTAGTAGATATCCTGACCACATGAAGAGACATGACTTCTTCAAGTCCGCTATGCCA<br/> GAGGGATACGTCCAAGAGAGAACGATCTCTTTCAAGGACGACGGTACTTATAAGACT<br/> AGAGCTGAGGTTAAGTTTGGGGAGACACTTTAGTCAATAGGATCGAGTTGAAGGG<br/> GATTGACTTTAAGGAAGACGGAAACATTTGGGTCCACAAGTTGGAGTATAATTTTAA<br/> AGTCATAATGTCTATATTACGGCTGACAAGCAGAAGAATGGCATAAAGGCAAACTTCA<br/> AAGATTAGACACAACGTGGAAGACGGTCCGTGCAATTGGCGGACCATTACCAAA<br/> AAATACCTCAATCGGGGACGGTCCAGTCTTGTTCCTGACAACCATTATCTTCTAC<br/> CCAATCAGTGCTATCAAAGGACCCTAATGAGAAGAGGGACCACATGGTCTATTAGA<br/> GTTCTGTGACAGCTGCTGGAATTACTCATGGAATGGACGAGTTATACAAGGGCggatcc<br/> ggtctagattggaagagaattgagaaggagattaactgag<b>taa</b><br/> (Uppercase, <i>Grx5</i> and <i>sfGFP</i>; bold/underlined: start and stop codons)</p> | <p>Fig. 3c-e,<br/> ED Fig. 8d-i,<br/> and 9a-h,j</p> |
| <p>pYC006<br/> (pYTK-e112<br/> <i>pGAL1-Grx5-S99(TM)-sfGFP</i>)</p> | <p><b>atg</b>tttctccaaaattcaatccataaggtcattttccccatctccgggtaagactcttctcgttaccaaaatcgatgtatt<br/> tgagcacagagataagaaaagctattgaagatgcatcgaatccagctcagtggttctttcatgaaaggtactcctgaattc<br/> ccaagtggtgatttcaagagcaaccattgattattaggaaatcaagcggtgacccggccaaaattgcccgttataatgttt<br/> agaagaccagagctacgtgaaggtatcaaagatggtttcagaatggccaactatccacagttatgtaacaaagaattc<br/> attgtggtatgtatgtattacaagtatggcagcgtctggtgaattggcgatgctagaagggcacagcattgggtacctg<br/> cgggatcaggaggttctcaggtatgacgttctaccgttccaaaatccaagctgctgcaacaagactcaAGAATTTGT<br/> ACTCAATCTTGGACTGCTTTGAGAGTTGGTGCTATTTTGGCTGCAACTagttccgtggcgtat<br/> ctgaactggcataatggccaatcgacaacgagccgaaactggatgataaaacaaagattcggccgtgaagttgc<br/> caagcataacaagcccgatgattcgtgggtgtgatcaatggttacgtatacagctctggatccggcggtacctccaaggga<br/> gaggagttgctcaggtgtacctatctggtcaggttagacggcagctcaacggacacaagtttagtgaagggga<br/> gggagaggggtgacgctaccaatggaaggttaactttaagttcatatccactactggcaagttacctgtccctgtgccttcta<br/> gtgactttgacatacggagtacaatgttagtatatcctgaccacatgaagagacatgacttctcaagtccgctatgc<br/> cagagggatcgtccaagagagaacgatcttccaaggacgagcgttactataagactagagctgaggttaagttgagg<br/> gagacactttagtcaataggatcgagttgaaggggattgactttaaggaagacggaaacattttgggtcacaagttggagat<br/> aattttaacagctcataatgtctatattacggctgacaagcagaagaatggcataaaggcaaacctcaagattgacacaacg<br/> tggaagacgggtccgtgcaattggcggaccattaccaacaaaactccaatcggggacggctcagcttgtctgcaaa</p>                                                                                                                                                                                                                                                                                 | <p>ED Fig. 8d</p>                                    |

|                                                                                 |                                                                                                                                                                                                                                                                                                                                                                                                                                                                                                                                                                                                                                                                                                                                                                                                                                                                                                                                                                                                                                                                                                                                                                                                                                                                                                                                                                                                                                                                                                                                                                                                                                                                                                                           |                   |
|---------------------------------------------------------------------------------|---------------------------------------------------------------------------------------------------------------------------------------------------------------------------------------------------------------------------------------------------------------------------------------------------------------------------------------------------------------------------------------------------------------------------------------------------------------------------------------------------------------------------------------------------------------------------------------------------------------------------------------------------------------------------------------------------------------------------------------------------------------------------------------------------------------------------------------------------------------------------------------------------------------------------------------------------------------------------------------------------------------------------------------------------------------------------------------------------------------------------------------------------------------------------------------------------------------------------------------------------------------------------------------------------------------------------------------------------------------------------------------------------------------------------------------------------------------------------------------------------------------------------------------------------------------------------------------------------------------------------------------------------------------------------------------------------------------------------|-------------------|
|                                                                                 | <p>ccattatctttctaccaatcagtgctatcaaaggaccctaatagagaagaggaccacatggctctattagagttcgtgacagc<br/> tgctggaattactcatggaatggacgagttatacaagggcggatccggttctagattggaagaggaattgagaaggagatta<br/> actgag<b>taa</b><br/> (Uppercase, sorting signal with IC mutation; bold/underlined: start and stop codons)</p>                                                                                                                                                                                                                                                                                                                                                                                                                                                                                                                                                                                                                                                                                                                                                                                                                                                                                                                                                                                                                                                                                                                                                                                                                                                                                                                                                                                                                        |                   |
| <p>pYC007<br/> (pYTK-e112<br/> pGAL1-Grx5-S80-<br/> sfGFP-2xTEV-<br/> ALFA)</p> | <p><b>atg</b>tttctccaaaattcaatcccataaaggctattttccccatcctcgggctaagactcttctcgttaccaaaatcgggatgatt<br/> tgagcacagagataagaaaagctattgaagatgcatcgatccgctccagtggttctttcatgaaaggactcctgaattc<br/> ccaagtgtggatttcaagagcaaccattggattattaggaaatcaaggcgtgaccggccaaattgctgggtataatgttt<br/> agaagaccagagctacgtgaaggatcaaagagtttcagaatggccaactattccacagttatatgtaaacaaaagaattc<br/> attggtggatgtgatgtattacaagatggcacgctctggatgaattggccgattgctagaagaggcacaggcattggtaacctg<br/> gcggatcaggagggttctcaggtagttacgggtctaccgttccaaaatcaagtcggtcgaacaagactcaagttcctggcgt<br/> atctgaaactggcataatggccaaatcgacaacgagccgaaactggatataaatacaaaagatttcccctggaagttg<br/> ccaagcataacaagccgatgattcgtgggtgtgatcaatggttacgtatacgaactctggatccggcggtaacctcaaggg<br/> agaggagttgtcactggagttgtacatcttggtcgagttagacggcgacgtcaacggacacaagtttagtgaagaggtg<br/> agggagaggggtgacgctaccaatggaagtttaactttaaagttcatatccactactggcaagttacctgtcccttgcctactt<br/> agtgactactttgacatacggagtacaatgttttagtagatatcctgaccacatgaagagacatgactcttcaagtcctctatg<br/> ccagagggatacgtccaagagagaacgatctcttcaaggacgacgggtactataagactagagctgaggttaagtttgag<br/> ggagacacttagtcaataggatcgagttgaaggggattgactttaaggaagacggaacaatttgggtcacaagttggagt<br/> ataatttaacagtcataatgtctatattacggctgacaagcagaagaatggcataaaggcaaaactcaagattagacaca<br/> cgtggaagacggttccgtgcaattggcggaccattaccaacaaaatactccaatcggggacgggtccagtcctgttgcctgac<br/> aaccattatctttctacccaatcagtgctatcaaaggaccctaatagagaagaggaccacatggctctattagagttcgtgac<br/> agctgctggaattactcatggaatggacgagttatacaagggcggatccggcGAAAAATTTACTTTCAAGGT<br/> ggttctggaagttgGAAACTTGATTTCCAAGGaggctcaagattggaagaggaattgagaaggagatta<br/> ctgag<b>taa</b><br/> (Uppercase, TEV cleavage sites; bold/underlined: start and stop codons)</p> | <p>ED Fig. 8a</p> |
